# Supplementary material
Source: PubMed Central journal article supplement (PMC6121727)
Supplement: NIHMS983804-supplement.pdf [file NIHMS983804-supplement.pdf]

## Bioactive Lipid Mediators Profiles In Human Psoriasis Skin And Blood

Alexander V. Sorokin<sup>1</sup>, Anthony F. Domenichiello<sup>2</sup>, Amit K. Dey<sup>1</sup>, Aditya Goyal<sup>1</sup>, Shawn M. Rose<sup>3</sup>, Martin P. Playford<sup>1</sup>, Christopher E. Ramsden<sup>2,4,5</sup> and Nehal N. Mehta<sup>1</sup>

### Supplementary Information

#### SM: Supplementary Methods

##### SM1

*Study population.* Participants for the plasma study were middle-aged whites (mean age: psoriasis 48.13 years vs. healthy volunteers 48.37 years) without known history of alcohol use and one case of tobacco smoke. The predominant part of the psoriasis subjects was on topical therapy (66.67%), while 21.67% were receiving systemic therapy. A separate set of subjects enrolled for the skin and serum analyses consisted of middle-aged whites (mean age: psoriasis 56.71 years vs. healthy volunteers 43.29 years) without known history of tobacco or alcohol use. Psoriasis participants had median PASI score of 6.5, consistent with moderate-to-severe psoriasis. Average psoriasis disease duration in this cohort was 23.75 years. The majority of the psoriasis subjects were on topical therapy (62.50%), while 12.50% were receiving biologic therapy. Two psoriasis patients and 2 healthy subjects were on 1000 mg of fish oil per day before enrolling into the study. Two patients had associated psoriatic arthritis (25%). Additionally, high-sensitivity C-reactive protein (hsCRP) level was not significantly different in the psoriasis subjects, compared to healthy (0.76 mg/L vs. 1.30 mg/L, correspondingly, P=0.18).

##### SM2

*LC-MS/MS-based lipidomics of psoriasis skin and serum.* Punch biopsies were transferred into FastPrep Lysing Matrix tubes on ice (MP Biomedicals, USA; Lysing Matrix A) and at least 8 times greater volume ice-cold methanol with 0.02% of BHT and 0.02% of EDTA was immediately added to each tube (v/v). Tissue and standard curve were spiked with 9 deuterated internal standards (Cayman Chemical, Ann Arbor, MI, USA). Internal standards were chosen based on their similarity to analytes of interest. A known amount of internal standard was added to each sample and samples were homogenized using a FastPrep-24 homogenizer (MP Bio).

Tissue homogenates were transferred to -80°C for 1 hour to precipitate proteins. Homogenates were centrifuged at 17000g in 4°C for 10 min and supernatant was transferred to a new test tube. Half the supernatant was stored in -80 °C until solid phase extraction (SPE) purification and LC-MS/MS analysis (see below). To permit analysis of total lipid pools the other half of the supernatant was saponified with 2.6% sodium carbonate (by weight) at 60°C for 30 min under gentle shaking. The solution was then neutralized (pH 5-7) using acetic acid and stored in -80°C overnight. Immediately before purification by SPE and LC-MS/MS analysis, lipid extracts (free and saponified total) were added to 9-fold greater volume of ice cold water. Lipids were extracted from 200 µL of plasma by mixing with 500 µL of ice-cold methanol with 0.02% of BHT and 0.02% of EDTA and transferred to -80°C to precipitate proteins (as described above) after addition of known amounts of internal standard. After centrifugation, supernatant was then added to 9-fold greater volume of ice cold water and purified with SPE and analyzed by LC-MS/MS, as described below.

To quantify concentrations of lipid mediators in skin and plasma, lipid extracts were purified using SPE and ran quantified using LC-MS/MS. Briefly, SPE of bioactive lipids from biological matrices was performed using Strata X cartridges (33 µ, 200 mg/6 mL, Phenomenex, PA). The cartridges were conditioned with 6 mL of methanol, followed by 6 mL of water before samples were extracted. Samples were washed with 6 mL of 10% methanol. The lipids were eluted with 6 mL of methanol into a glass tube containing 10 µL of 30% glycerol in methanol. The eluate was evaporated to dryness under a stream of nitrogen and reconstituted with 40 µL of methanol, and an aliquot (10 µL) was injected into the LC-MS/MS system. A UPLC (Shimadzu Scientific Instruments, Columbia, MD) coupled with a Qtrap 5500 (AB SCIEX, USA) was used for qualitative and quantitative analysis. Briefly, separation was performed on a ZorBAX RRHD Eclipse Plus C18 column (100 mm x 4 mm; 1.8 µm) (Agilent Corporation, Palo Alto, CA) consisted of (A) 12 mM ammonium acetate solution and acetic acid (100:0.02 v/v) and (B) 12 mM ammonium acetate and was composed of acetonitrile / water / acetic acid (90:10:0.02, v/v/v). The flow rate was 0.5 mL/min. The column oven temperature was set at 30 °C. The elution gradient conditions were as follows: 25-40% B from 0-2.0 min, 40-46% B from 2 to 8 min, 46-57% B from 8 to 9 min, 57-66% B from 9 to 20 min, 66-76% B from 20 to 22 min, 76-100% B from 22 to 27

min, held at 100% B from 27 to 33 min, 100–25% B from 33.1 to 35 min. The mass spectrometer was operated in electrospray negative ionization using scheduled multiple reaction monitoring (sMRM) acquiring MRM data for each analyte with the retention time window of 90s. The source parameters were set as follows: ion spray voltage, –4500 V; nebulizer gas (GS1), 65 psi; turbo-gas (GS2), 70 psi; and the turbo ion spray source temperature (TEM), 500 °C. The analytes were quantified using MRM.

### **SM3**

*Sample Preparation.* Upon receipt of plasma samples, aliquots were immediately stored at –80 C until time of analysis. Samples were then extracted and prepared for analysis using Metabolon’s (Research Triangle Park, NC, USA) standard protocol. Briefly, the sample preparation process was carried out using the automated MicroLab STAR® system from Hamilton Company (Reno, NV, USA). Recovery standards were added prior to the first step in the extraction process for quality control purposes. To remove protein, dissociate small molecules bound to protein or trapped in the precipitated protein matrix, and to recover chemically diverse metabolites, proteins were precipitated with methanol under vigorous shaking for 2 min (Glen Mills GenoGrinder 2000, Clifton, NJ, USA) followed by centrifugation. The resulting extract was divided into two fractions; one for analysis by LC and one for analysis by GC. Samples were placed briefly on a TurboVap® (Zymark / Sotax Corporation, Westborough, MA, USA) to remove the organic solvent. For LC, the samples were stored overnight under nitrogen before preparation for analysis. For GC, each sample was dried under vacuum overnight before preparation for analysis. Samples were then prepared for the appropriate instrument, either LC/MS or GC/MS.

*Ultrahigh performance liquid chromatography/Mass Spectrometry (UPLC/MS/MS).* The LC/MS portion of the platform was based on a Waters ACQUITY ultra-performance liquid chromatography (UPLC) and a ThermoFisher Scientific Orbitrap Elite high resolution/accurate mass spectrometer, which consisted of a heated electrospray ionization (HESI) source and orbitrap mass analyzer operated at 30,000 mass resolution. The sample extract was dried then reconstituted in acidic or basic LC-compatible solvents, each of which contained 8 or more injection standards at fixed concentrations to ensure injection and chromatographic

consistency. One aliquot was analyzed using acidic positive ion optimized conditions and the other using basic negative ion optimized conditions in two independent injections using separate dedicated columns. Extracts reconstituted in acidic conditions were gradient eluted using water and methanol containing 0.1% formic acid, while the basic extracts, which also used water/methanol, contained 6.5mM ammonium bicarbonate. The MS analysis alternated between MS and data-dependent MS<sup>2</sup> scans using dynamic exclusion.

*Gas chromatography/Mass Spectrometry (GC/MS).* The samples destined for GC/MS analysis were re-dried under vacuum desiccation for a minimum of 24 hours prior to being derivatized under dried nitrogen using bistrimethyl-silyl-trifluoroacetamide (BSTFA). The GC column was 5% phenyl and the temperature ramp is from 40° to 300° C in a 16 minute period. Samples were analyzed on a Thermo-Finnigan Trace DSQ fast-scanning single-quadrupole mass spectrometer using electron impact ionization. The instrument was tuned and calibrated for mass resolution and mass accuracy on a daily basis.

*Metabolite identification:* Compounds were identified by comparison to library entries of purified standards or recurrent unknown entities. Identification of known chemical entities was based on comparison to metabolomic library entries of more than 2000 commercially available purified standards. The combination of chromatographic properties and mass spectra gave an indication of a match to the specific compound or an isobaric entity. Additional entities could be identified by virtue of their recurrent nature (both chromatographic and mass spectral). These compounds have the potential to be identified by future acquisition of a matching purified standard or by classical structural analysis.

*Data normalization.* For studies spanning multiple days, a data normalization step was performed to correct variation resulting from instrument inter-day tuning differences. Essentially, each compound was corrected in run-day blocks by registering the medians to equal one (1.00) and normalizing each data point proportionately. For studies that did not require more than one day of analysis, no normalization was necessary, other than for purposes of data visualization.

## SM4

*Statistical analyses.* Data reported as mean  $\pm$  SEM or median and interquartile range for continuous variables and frequencies (N, %) for categorical variables. For Metabolon data analyses values were normalized in terms of raw area counts. Each biochemical then was rescaled to set the median equal to 1 and described as scaled intensity. For lipid mediator analyses if a particular lipid mediator was below the limit of detection in a sample, its value was imputed as  $\frac{1}{2}$  the limit of detection. If a lipid mediator was below the limit of quantitation in more than 50% of the samples in a given group then concentrations of that mediator for that group were not reported. Data were analyzed with a single 2-tailed unpaired Student's *t* test for parametric variables and the Mann-Whitney *t* test for non-parametric variables. The Pearson's Chi-square test was used for categorical variables. For pair-wise Metabolon data comparisons, Welch's *t*-tests was applied along with the false discovery rate (q-value) adjustment for considering the multiple comparisons. For classification of the best discriminators, Random Forest analysis was used. Linear regression analysis for BMI with different bioactive metabolites and pathway precursors identified in psoriasis plasma was performed using Stata/IC 12.0 (StataCorp LP, College Station, TX, USA).  $P \leq 0.05$  was considered statistically significant.

**Table S1.** Demographic and clinical characteristics of the study groups

| <b>Parameter</b>                        | <b>PSO (N=60)</b> | <b>Healthy (N=30)</b> | <b>P</b>     |
|-----------------------------------------|-------------------|-----------------------|--------------|
| <b>Demographics and medical history</b> |                   |                       |              |
| Age (years)                             | 48.17 ± 1.64      | 48.37 ± 2.46          | 0.47         |
| Male sex, n (%)                         | 30 (50)           | 15 (50)               | 1.00         |
| Ethnicity, whites (%)                   | 60 (100)          | 30 (100)              | 1.00         |
| Body mass index (kg/m <sup>2</sup> )    | 30.76 ± 0.99      | 27.32 ± 1.12          | <b>0.02</b>  |
| Type 2 diabetes mellitus, n (%)         | 0 (0)             | 0 (0)                 | -            |
| Current tobacco use, n (%)              | 1 (1.7)           | 0 (0)                 | 0.51         |
| Current alcohol use, n (%)              | 0 (0)             | 0 (0)                 | -            |
| <b>Clinical and laboratory values</b>   |                   |                       |              |
| Systolic blood pressure (mmHg)          | 127.9 ± 2.83      | 162.08 ± 8.16         | <b>0.002</b> |
| Diastolic blood pressure (mmHg)         | 80.51 ± 2.16      |                       |              |
| Total cholesterol (mg/dl)               | 189.5 ± 5.30      |                       |              |
| Triglycerides (mg/dl)                   | 146 ± 13.94       |                       |              |
| HDL cholesterol (mg/dl)                 | 55.5 ± 2.82       |                       |              |
| LDL cholesterol (mg/dl)                 | 109.4 ± 4.47      |                       |              |
| ApoA1 (mg/L)                            | 161.2 ± 5.24      |                       |              |
| ApoB (mg/L)                             | 99.2 ± 3.21       |                       |              |
| ApoB / ApoA1                            | 0.66 ± 0.32       |                       |              |
| Glucose (mg/dl)                         | 89.45 ± 1.71      |                       |              |
| <b>Psoriasis Treatment</b>              |                   |                       |              |
| Topical therapy, n (%)                  | 40 (66.67)        |                       |              |
| Biologic therapy, n (%)                 | 0 (0)             |                       |              |
| Systemic therapy, n (%)                 | 13 (21.67)        |                       |              |

HDL, high-density lipoprotein; LDL, low-density lipoprotein. Data represented as mean ± SE and as n (%) for categorical variables.

**Table S2.** Demographic and clinical characteristics of the separate study groups

| Parameter                               | PSO (N=8)        | Healthy (N=7)   | P    |
|-----------------------------------------|------------------|-----------------|------|
| <b>Demographics and medical history</b> |                  |                 |      |
| Age (years)                             | 56.71 ± 5.63     | 43.29 ± 5.92    | 0.06 |
| Male sex, n (%)                         | 6 (75)           | 6 (85)          | 0.61 |
| Ethnicity, whites (%)                   | 8 (100)          | 7 (100)         | 1.00 |
| Body mass index (kg/m <sup>2</sup> )    | 32.43 ± 2.61     | 27.36 ± 1.98    | 0.08 |
| Hypertension, n (%)                     | 2 (25)           | 2 (29)          | 0.88 |
| Hyperlipidemia, n (%)                   | 5 (63)           | 4 (57)          | 0.83 |
| Type 2 diabetes mellitus, n (%)         | 1 (13)           | 1 (14)          | 0.92 |
| Current tobacco use, n (%)              | 0 (0)            | 0 (0)           | -    |
| Current alcohol use, n (%)              | 0 (0)            | 0 (0)           | -    |
| <b>Clinical and laboratory values</b>   |                  |                 |      |
| Systolic blood pressure (mmHg)          | 122.6 ± 5.79     | 111.7 ± 4.37    | 0.08 |
| Diastolic blood pressure (mmHg)         | 72.6 ± 2.63      | 67.9 ± 3.60     | 0.15 |
| Total cholesterol (mg/dl)               | 160.8 ± 9.06     | 178.4 ± 19.47   | 0.20 |
| Triglycerides (mg/dl)                   | 120 ± 20.32      | 103.6 ± 22.28   | 0.30 |
| HDL cholesterol (mg/dl)                 | 52.5 ± 6.08      | 54.6 ± 5.62     | 0.40 |
| LDL cholesterol (mg/dl)                 | 84.3 ± 6.53      | 103.3 ± 20.50   | 0.18 |
| ApoA1 (mg/L)                            | 149.4 ± 7.87     | 142.9 ± 6.90    | 0.27 |
| ApoB (mg/L)                             | 78.6 ± 5.13      | 84.4 ± 10.57    | 0.31 |
| ApoB / ApoA1                            | 0.64 ± 0.13      | 0.60 ± 0.08     | 0.40 |
| FRS (IQR)                               | 2.5 (1-8.5)      | 6 (1-7)         | 0.86 |
| hsCRP (mg/L) (IQR)                      | 0.76 (0.55-1.37) | 1.30 (1.00-3.8) | 0.18 |
| Glucose (mg/dl)                         | 94.25 ± 4.45     | 96.00 ± 4.87    | 0.40 |
| Insulin (mg/dl)                         | 15.28 ± 4.12     | 15.64 ± 5.43    | 0.48 |
| WBC (cells/L)                           | 6.51 ± 0.60      | 7.38 ± 0.68     | 0.18 |
| <b>Psoriasis Severity and Treatment</b> |                  |                 |      |
| Disease duration (years)                | 23.75 ± 5.88     |                 |      |
| PASI score (IQR)                        | 6.5 (5.4-14.8)   |                 |      |
| Psoriatic arthritis, n (%)              | 2 (25)           |                 |      |
| Topical therapy, n (%)                  | 5 (62.50)        |                 |      |
| Biologic therapy, n (%)                 | 1 (12.50)        |                 |      |
| Systemic therapy, n (%)                 | 0 (0)            |                 |      |

FRS, Framingham Risk Score; HDL, high-density lipoprotein; hsCRP, high-sensitivity C-reactive protein; IQR, interquartile range; LDL, low-density lipoprotein; PASI, psoriasis area and severity index; PSO, psoriasis; WBC, white blood cell. Data are mean ± SE or median (Interquartile Range) for parametric and non-parametric variables respectively and as n (%) for categorical variables. P values were derived from a single unpaired 2-tailed t test for parametric variables and the Mann-Whitney test for non-parametric variables. The Pearson's Chi-square test was used for categorical variables. P<0.05 was considered statistically significant.

**Table S3.** Free form of bioactive SPM and pathway precursors identified in psoriasis and healthy skin

| Bioactive LM /<br>Pathway<br>Precursors | Lipid mediator levels (ng/g) |                    |              |                 |              |              |
|-----------------------------------------|------------------------------|--------------------|--------------|-----------------|--------------|--------------|
|                                         | Lesional Skin                | Non-Lesional Skin  | *P           | Healthy         | †P           | #P           |
| <b>AA Metabolome</b>                    |                              |                    |              |                 |              |              |
| LXA4                                    | *                            | *                  | —            | *               | —            | —            |
| LXB4                                    | *                            | *                  | —            | *               | —            | —            |
| 5,6-EET                                 | *                            | *                  | —            | *               | —            | —            |
| 8,9-EET                                 | 3.8 (1.0-11.3)               | *                  | —            | *               | —            | —            |
| 11,12-EET                               | 0.8 (0.6-3.2)                | 2.2 (1.5-7.5)      | 0.46         | *               | —            | —            |
| 14,15-EET                               | 0.5 (0.3-2.2)                | 1.1 (0.6-4.3)      | 0.14         | *               | —            | —            |
| 5-oxoETE                                | *                            | *                  | —            | *               | —            | —            |
| LTB4                                    | *                            | *                  | —            | *               | —            | —            |
| PGE2                                    | 108.1 (16.0-345.4)           | *                  | —            | *               | —            | —            |
| PGD2                                    | —                            | —                  | —            | —               | —            | —            |
| PGF2 $\alpha$                           | *                            | *                  | —            | *               | —            | —            |
| 8-IsoPGF2a                              | 4.5 (0.3-11.8)               | 5.2 (4.3-14.4)     | 0.92         | 6.7 (0.5-21.7)  | 0.36         | 0.46         |
| TXB2                                    | 1.5 (0.7-7.0)                | 3.5 (2.3-9.0)      | <b>0.01</b>  | 1.9 (1.1-3.6)   | 0.42         | 0.40         |
| 20-HETE                                 | *                            | *                  | —            | *               | —            | —            |
| 15-HETE                                 | 31.1 (12.3-323.4)            | 71.7 (18.0-1224.9) | 0.34         | 3.1 (1.4-5.3)   | <b>0.02</b>  | <b>0.04</b>  |
| 12-HETE                                 | 395.0 (135.4-2351.6)         | 155.8 (29.3-206.4) | <b>0.05</b>  | 3.1 (1.8-16.7)  | <b>0.004</b> | <b>0.03</b>  |
| 11-HETE                                 | 13.9 (1.0-44.3)              | 1.8 (1.0-27.6)     | 0.08         | 0.9 (0.7-1.3)   | <b>0.05</b>  | 0.16         |
| 9-HETE                                  | *                            | 7.6 (5.0-30.2)     | 0.06         | 4.0 (3.0-5.1)   | <b>0.03</b>  | -            |
| 8-HETE                                  | *                            | 6.8 (4.8-29.1)     | 0.09         | 3.8 (2.9-4.8)   | <b>0.005</b> | -            |
| 5-HETE                                  | 5.2 (1.2-14.2)               | 2.9 (1.2-14.8)     | <b>0.05</b>  | 1.2 (1.0-1.6)   | 0.17         | 0.17         |
| <b>LA Metabolome</b>                    |                              |                    |              |                 |              |              |
| 9-HODE                                  | 307.8 (31.5-606.1)           | 12.0 (7.4-108.3)   | <b>0.005</b> | 5.6 (4.6-7.1)   | <b>0.002</b> | <b>0.04</b>  |
| 13-HODE                                 | 607.9 (56.9-1523.7)          | 36.4 (14.8-1222.3) | <b>0.02</b>  | 5.4 (4.4-10.9)  | <b>0.001</b> | <b>0.05</b>  |
| 9,10-EpOME                              | 3.3 (1.2-5.8)                | 0.8 (0.5-5.6)      | <b>0.05</b>  | 0.4 (0.2-0.5)   | <b>0.02</b>  | <b>0.05</b>  |
| 12,13-EpOME                             | *                            | *                  | —            | *               | —            | —            |
| 9,10-DiHOME                             | 3.6 (1.5-5.6)                | 1.0 (0.8-3.8)      | 0.07         | 1.3 (0.9-2.5)   | 0.17         | 0.73         |
| 12,13-DiHOME                            | 3.9 (2.1-6.5)                | 1.7 (1.3-6.7)      | <b>0.05</b>  | 2.1 (1.4-2.8)   | 0.11         | 1.00         |
| 9-oxoODE                                | 194.0 (28.9-376.2)           | 0.3 (0.2-14.1)     | <b>0.003</b> | 0.2 (0.1-0.2)   | <b>0.001</b> | <b>0.06</b>  |
| 13-oxoODE                               | 528.4 (66.9-1100.2)          | 10.8 (6.4-172.9)   | <b>0.003</b> | 5.8 (4.9-6.3)   | <b>0.001</b> | <b>0.04</b>  |
| <b>ALA Metabolome</b>                   |                              |                    |              |                 |              |              |
| 9-HOTrE                                 | 0.4 (0.1-1.1)                | 0.2 (0.1-0.6)      | 0.12         | 0.04 (0.03-0.1) | <b>0.01</b>  | <b>0.004</b> |
| 13-HOTrE                                | 10.5 (3.0-22.8)              | *                  | —            | *               | —            | —            |
| <b>DHA Metabolome</b>                   |                              |                    |              |                 |              |              |
| RvD1                                    | *                            | *                  | —            | *               | —            | —            |
| RvD2                                    | *                            | *                  | —            | *               | —            | —            |
| Mar1                                    | *                            | *                  | —            | *               | —            | —            |
| 16,17-EDP                               | *                            | *                  | —            | *               | —            | —            |
| 19(20)-EDP                              | *                            | *                  | —            | *               | —            | —            |



|                       |                   |                  |      |   |   |   |
|-----------------------|-------------------|------------------|------|---|---|---|
| 10S,17S-diHDHA        | *                 | *                | —    | * | — | — |
| 17-HDHA               | 41.5 (10.7-193.5) | 25.6 (7.7-578.2) | 0.29 | * | — | — |
| 14-HDHA               | 17.6 (7.5-38.0)   | 7.3 (2.3-26.4)   | 0.37 | * | — | — |
| 7-HDHA                | 11.5 (5.6-25.8)   | *                | —    | * | — | — |
| 4-HDHA                | *                 | *                | —    | * | — | — |
| <b>EPA Metabolome</b> |                   |                  |      |   |   | — |
| 18-HEPE               | *                 | *                | —    | * | — | — |
| 17(18)-EpETE          | *                 | *                | —    | * | — | — |
| 14(15)-EpETE          | *                 | *                | —    | * | — | — |

Quantification of bioactive lipid mediators (LM) and pathway precursors were assessed by liquid chromatography tandem mass spectrometry-based (LC-MS/MS-based) metabololipidomics. Results are expressed as ng/g tissue. Detection limit was approximately 0.02 ng/sample; \* denotes below limits. Results represented as standardized beta coefficient from 7–8 subjects per group. \*P compared between lesional vs. non-lesional skin. †P compared between lesional vs. healthy skin. Data are median (Interquartile Range) for non-parametric variables. #P compared between non-lesional vs. healthy skin. P values were derived from Mann-Whitney test for non-parametric variables. P<0.05 was considered statistically significant.

**Table S4.** Total form of bioactive SPM and pathway precursors identified in psoriasis and healthy skin

| Bioactive LM /<br>Pathway<br>Precursors | Lipid mediator levels (ng/g) |                       |             |                      |             |             |
|-----------------------------------------|------------------------------|-----------------------|-------------|----------------------|-------------|-------------|
|                                         | Lesional Skin                | Non-Lesional Skin     | *P          | Healthy              | †P          | #P          |
| <b>AA Metabolome</b>                    |                              |                       |             |                      |             |             |
| LXA4                                    | *                            | *                     | —           | *                    | —           | —           |
| LXB4                                    | *                            | *                     | —           | *                    | —           | —           |
| 5,6-EET                                 | 422.6 (6.1-985.9)            | 145.0 (82.6-515.8)    | 0.46        | 93.2 (10.4-647.2)    | 1.00        | 0.62        |
| 8,9-EET                                 | 46.7 (26.5-62.3)             | 56.9 (19.7-790.2)     | 0.92        | 21.0 (8.9-279.5)     | 0.56        | 0.42        |
| 11,12-EET                               | 43.4 (23.6-59.8)             | 44.3 (19.7-115.6)     | 0.21        | 23.5 (10.2-36.7)     | 0.20        | 0.36        |
| 14,15-EET                               | 33.5 (16.8-57.8)             | 33.7 (19.4-90.6)      | 0.17        | 19.2 (9.5-27.8)      | 0.16        | 0.25        |
| 5-oxoETE                                | 1129.5 (808.4-1582.4)        | 1086.4 (755.8-2675.8) | 0.25        | 731.6 (663.9-1470.6) | 0.35        | 0.30        |
| LTB4                                    | *                            | *                     | —           | *                    | —           | —           |
| PGE2                                    | —                            | —                     | —           | —                    | —           | —           |
| PGD2                                    | —                            | —                     | —           | —                    | —           | —           |
| PGF2 $\alpha$                           | —                            | —                     | —           | —                    | —           | —           |
| 8-IsoPGF2a                              | —                            | —                     | —           | —                    | —           | —           |
| TXB2                                    | *                            | *                     | —           | *                    | —           | —           |
| 20-HETE                                 | *                            | *                     | —           | *                    | —           | —           |
| 15-HETE                                 | 125.8 (47.0-458.4)           | 225.5 (99.9-2371.8)   | 0.75        | 48.4 (38.2-99.3)     | 0.11        | 0.11        |
| 12-HETE                                 | 550.0 (199.9-2475.2)         | 253.3 (65.0-2226.4)   | <b>0.03</b> | 51.7 (18.5-93.1)     | <b>0.02</b> | 0.08        |
| 11-HETE                                 | 36.5 (21.1-85.1)             | 24.4 (17.8-136.4)     | 0.09        | 13.1 (8.3-17.8)      | 0.06        | 0.08        |
| 9-HETE                                  | 46.8 (26.8-113.5)            | 42.9 (29.3-269.0)     | 0.19        | 21.2 (18.9-25.5)     | <b>0.05</b> | 0.06        |
| 8-HETE                                  | 73.5 (22.0-153.5)            | 23.9 (16.9-193.9)     | <b>0.02</b> | 12.9 (8.1-15.5)      | <b>0.04</b> | 0.11        |
| 5-HETE                                  | 62.3 (44.2-115.8)            | 77.8 (45.5-398.8)     | 0.06        | 70.0 (44.1-94.0)     | 0.91        | 0.64        |
| <b>LA Metabolome</b>                    |                              |                       |             |                      |             |             |
| 9-HODE                                  | 553.1 (121.0-858.2)          | 161.1 (133.5-960.9)   | <b>0.02</b> | 126.2 (94.4-134.8)   | 0.13        | 0.06        |
| 13-HODE                                 | 904.6 (154.9-1879.5)         | 209.2 (183.4-2297.9)  | <b>0.05</b> | 150.0 (101.5-154.0)  | <b>0.05</b> | <b>0.02</b> |
| Total HODE                              |                              |                       |             |                      |             |             |
| 9,10-EpOME                              | 77.1 (38.7-102.0)            | 107.7 (66.3-562.2)    | 0.83        | 52.8 (28.5-104.1)    | 0.73        | 0.13        |
| 12,13-EpOME                             | 177.2 (88.1-252.5)           | 244.7 (148.6-1409.2)  | 0.91        | 120.0 (65.5-241.3)   | 0.73        | 0.06        |
| 9,10-DiHOME                             | 5.6 (4.5-11.2)               | 5.5 (3.5-12.7)        | 0.21        | 3.4 (2.3-5.6)        | 0.13        | 0.25        |

|                       |                      |                     |             |                    |             |             |
|-----------------------|----------------------|---------------------|-------------|--------------------|-------------|-------------|
| 12,13-DiHOME          | 13.0 (7.8-20.2)      | 12.9 (7.3-29.5)     | 0.21        | 8.8 (4.6-15.6)     | 0.35        | 0.36        |
| 9-oxoODE              | 383.8 (163.1-662.8)  | 224.3 (165.1-798.7) | <b>0.01</b> | 120.4 (90.9-252.6) | 0.11        | 0.25        |
| 13-oxoODE             | 618.3 (165.6-1163.2) | 236.4 (170.9-993.8) | <b>0.02</b> | 131.5 (89.2-264.7) | 0.08        | 0.20        |
| <b>ALA Metabolome</b> |                      |                     |             |                    |             |             |
| 9-HOTrE               | 1.2 (0.7-2.8)        | 1.2 (0.9-3.5)       | 0.40        | 0.9 (0.6-1.0)      | 0.49        | 0.08        |
| 13-HOTrE              | 15.1 (9.5-31.5)      | 15.2 (11.5-83.0)    | 0.86        | 16.0 (10.1-17.1)   | 0.56        | 0.95        |
| <b>DHA Metabolome</b> |                      |                     |             |                    |             |             |
| RvD1                  | *                    | *                   | –           | *                  | –           | –           |
| RvD2                  | *                    | *                   | –           | *                  | –           | –           |
| Mar1                  | *                    | *                   | –           | *                  | –           | –           |
| 16,17-EDP             | 12.5 (7.6-28.3)      | 19.8 (9.9-56.5)     | 0.49        | –                  | –           | –           |
| 19(20)-EDP            | 13.1 (8.3-31.2)      | 16.4 (10.7-57.7)    | 0.35        | 10.1 (4.5-16.8)    | 0.35        | 0.20        |
| 10S,17S-diHDHA        | *                    | *                   | –           | *                  | –           | –           |
| 17-HDHA               | 98.7 (36.7-338.0)    | 93.3 (52.6-861.4)   | 0.30        | 48.1 (14.1-59.0)   | 0.20        | 0.09        |
| 14-HDHA               | 40.8 (13.8-60.8)     | 22.0 (8.6-136.3)    | 0.16        | 5.4 (4.4-9.6)      | <b>0.03</b> | <b>0.05</b> |
| 7-HDHA                | 20.6 (8.9-27.4)      | 14.5 (4.5-53.8)     | 0.09        | *                  | –           | –           |
| 4-HDHA                | 21.6 (18.3-63.3)     | 27.7 (17.0-127.9)   | 0.06        | 17.8 (13.6-29.5)   | 0.25        | 0.30        |
| <b>EPA Metabolome</b> |                      |                     |             |                    |             |             |
| 18-HEPE               | 1.9 (1.3-7.0)        | 3.3 (2.2-20.1)      | 0.41        | 2.9 (1.5-3.2)      | 1.00        | 0.09        |
| 17(18)-EpETE          | *                    | *                   | –           | *                  | –           | –           |
| 14(15)-EpETE          | 0.7 (0.2-1.5)        | 2.1 (0.6-7.0)       | 0.38        | *                  | –           | –           |

Quantification of bioactive lipid mediators (LM) and pathway precursors were assessed by liquid chromatography tandem mass spectrometry-based (LC-MS/MS-based) metabololipidomics. Results are expressed as ng/g tissue. Detection limit was approximately 0.03 ng/sample; \* denotes below limits. Results represented as standardized beta coefficient from 7–8 subjects per group. \*P compared between lesional vs. non-lesional skin. †P compared between lesional vs. healthy skin. Data are median (Interquartile Range) for non-parametric variables. #P compared between non-lesional vs. healthy skin. P values were derived from Mann-Whitney test for non-parametric variables. P<0.05 was considered statistically significant.

**Table S5.** Bioactive SPM and pathway precursors identified in psoriasis and healthy serum

| <b>Bioactive LM / Pathway Precursors</b> |                  |               |                |                 |             |
|------------------------------------------|------------------|---------------|----------------|-----------------|-------------|
| <b>AA Metabolome</b>                     | <b>Psoriasis</b> |               | <b>Healthy</b> |                 | <b>P</b>    |
| LXA4                                     | *                |               | *              |                 | –           |
| LXB4                                     | *                |               | *              |                 | –           |
| 5,6-EET                                  | *                |               | *              |                 | –           |
| 8,9-EET                                  | 0.11             | (0.09, 0.12)  | 0.14           | (0.11, 0.34)    | 0.18        |
| 11,12-EET                                | 0.08             | (0.07, 0.09)  | 0.11           | (0.07, 0.13)    | 0.30        |
| 14,15-EET                                | 0.14             | (0.14, 0.17)  | 0.20           | (0.15, 0.24)    | <b>0.05</b> |
| 5-oxoETE                                 | 0.10             | (0.09, 0.13)  | 0.13           | (0.10, 0.17)    | 0.37        |
| LTB4                                     | 0.23             | (0.15, 0.28)  | 0.41           | (0.27, 0.45)    | 0.12        |
| PGE2                                     | 0.09             | (0.06, 0.14)  | 0.11           | (0.06, 0.20)    | 0.52        |
| PGD2                                     | *                |               | *              |                 | –           |
| PGF2 $\alpha$                            | *                |               | *              |                 | –           |
| 8-IsoPGF2a                               | *                |               | *              |                 | –           |
| TXB2                                     | 0.97             | (0.17, 10.04) | 12.86          | (0.41, 31.40)   | 0.25        |
| 20-HETE                                  | 0.63             | (0.39, 0.77)  | 0.89           | (0.74, 1.15)    | 0.07        |
| 15-HETE                                  | 0.50             | (0.31, 0.80)  | 1.44           | (1.12, 3.25)    | <b>0.02</b> |
| 12-HETE                                  | 14.85            | (4.70, 30.20) | 74.25          | (37.40, 524.00) | <b>0.04</b> |
| 11-HETE                                  | 0.20             | (0.18, 0.69)  | 0.99           | (0.60, 1.59)    | <b>0.04</b> |
| 9-HETE                                   | 0.25             | (0.14, 0.25)  | 0.24           | (0.14, 0.25)    | 0.80        |
| 8-HETE                                   | 0.25             | (0.21, 0.29)  | 0.33           | (0.25, 1.28)    | 0.07        |
| 5-HETE                                   | 0.80             | (0.69, 1.63)  | 1.31           | (1.09, 1.45)    | 0.61        |
| <b>LA Metabolome</b>                     |                  |               |                |                 |             |
| 9-HODE                                   | 2.96             | (2.10, 3.22)  | 3.60           | (2.80, 4.26)    | 0.12        |
| 13-HODE                                  | 3.00             | (2.22, 3.43)  | 4.91           | (2.41, 7.21)    | 0.30        |
| 9,10-EpOME                               | 0.97             | (0.84, 1.11)  | 1.23           | (0.70, 2.07)    | 0.44        |
| 12,13-EpOME                              | 4.28             | (3.49, 5.06)  | 5.21           | (2.94, 6.99)    | 0.80        |
| 9,10-DiHOME                              | 1.10             | (0.72, 1.43)  | 0.93           | (0.75, 1.00)    | 0.61        |
| 12,13-DiHOME                             | 1.14             | (0.85, 2.05)  | 1.21           | (0.82, 1.85)    | 0.90        |
| 9-oxoODE                                 | 0.37             | (0.34, 0.50)  | 0.44           | (0.25, 0.47)    | 0.90        |
| 13-oxoODE                                | 0.65             | (0.52, 0.75)  | 0.71           | (0.57, 0.80)    | 0.90        |
| <b>ALA Metabolome</b>                    |                  |               |                |                 |             |
| 9-HOTrE                                  | 0.13             | (0.10, 0.17)  | 0.13           | (0.11, 0.19)    | 0.52        |
| 13-HOTrE                                 | 0.18             | (0.15, 0.36)  | 0.33           | (0.21, 0.46)    | <b>0.05</b> |
| <b>DHA Metabolome</b>                    |                  |               |                |                 |             |
| RvD1                                     | –                |               | –              |                 | –           |
| RvD2                                     | 0.06             | (0.04, 0.08)  | *              |                 | –           |
| Mar1                                     | *                |               | *              |                 | –           |
| 16,17-EDP                                | 0.11             | (0.09, 0.16)  | 0.13           | (0.11, 0.14)    | 0.95        |
| 19(20)-EDP                               | 0.20             | (0.13, 0.27)  | 0.24           | (0.19, 0.28)    | 0.44        |
| 10S,17S-diHDHA                           | –                |               | –              |                 | –           |
| 17-HDHA                                  | 0.49             | (0.36, 0.59)  | 1.13           | (0.53, 3.09)    | 0.09        |
| 14-HDHA                                  | 2.76             | (1.15, 5.40)  | 19.56          | (3.03, 71.40)   | 0.07        |
| 7-HDHA                                   | 0.04             | (0.01, 0.05)  | 0.08           | (0.03, 0.13)    | 0.14        |
| 4-HDHA                                   | 0.20             | (0.14, 0.40)  | 0.20           | (0.17, 0.26)    | 0.95        |

| <b>EPA Metabolome</b> |                   |                   |      |
|-----------------------|-------------------|-------------------|------|
| 18-HEPE               | 0.15 (0.11, 0.18) | 0.15 (0.14, 0.29) | 0.52 |
| 17(18)-EpETE          | *                 | *                 | –    |
| 14(15)-EpETE          | 0.01 (0.01, 0.02) | *                 | –    |

Quantification of bioactive lipid mediators (LM) and pathway precursors were assessed by liquid chromatography tandem mass spectrometry–based (LC-MS/MS–based) metabololipidomics. Results are expressed as ng/ml. Detection limit was approximately 0.02 ng; – denotes below limits; \* denotes only detection in one subject. Values are reported in the table as median (Interquartile Range) for non-parametric variables from 7–8 subjects per group. P values were derived from Mann-Whitney test for non-parametric variables. P<0.05 was considered statistically significant.

**Table S6.** Complete metabolomic profiling of psoriasis and healthy plasma

| Pathway                                  | Biochemical Name                   | Fold Change |              | All Samples |        | Omit Outlier |        |
|------------------------------------------|------------------------------------|-------------|--------------|-------------|--------|--------------|--------|
|                                          |                                    | All Samples | Omit Outlier | P           | q      | P            | q      |
| Glycine, serine and threonine metabolism | glycine                            | 0.87        | 0.88         | 0.0341      | 0.0919 | 0.0506       | 0.1158 |
|                                          | sarcosine (N-Methylglycine)        | 1.33        | 1.32         | 0.0614      | 0.1309 | 0.0815       | 0.1582 |
|                                          | dimethylglycine                    | 1.06        | 1.06         | 0.8224      | 0.6062 | 0.8432       | 0.6068 |
|                                          | N-acetylglycine                    | 1.21        | 1.21         | 0.4995      | 0.4804 | 0.5046       | 0.4762 |
|                                          | serine                             | 0.82        | 0.83         | 0.0116      | 0.0397 | 0.0174       | 0.0557 |
|                                          | N-acetyserine                      | 1.09        | 1.09         | 0.0767      | 0.1504 | 0.0820       | 0.1583 |
|                                          | threonine                          | 0.89        | 0.89         | 0.0020      | 0.0127 | 0.0015       | 0.0109 |
|                                          | N-acetylthreonine                  | 0.99        | 0.99         | 0.9589      | 0.6365 | 0.9785       | 0.6394 |
| Alanine and aspartate metabolism         | betaine                            | 0.89        | 0.90         | 0.0437      | 0.1068 | 0.0557       | 0.1210 |
|                                          | aspartate                          | 0.89        | 0.89         | 0.1349      | 0.2173 | 0.1377       | 0.2204 |
|                                          | asparagine                         | 0.68        | 0.69         | 0.0046      | 0.0206 | 0.0069       | 0.0287 |
|                                          | beta-alanine                       | 0.85        | 0.85         | 0.1044      | 0.1812 | 0.1086       | 0.1935 |
|                                          | 3-ureidopropionate                 | 1.11        | 1.10         | 0.5704      | 0.5120 | 0.6512       | 0.5390 |
|                                          | N-acetyl-beta-alanine              | 1.07        | 1.07         | 0.1606      | 0.2435 | 0.1775       | 0.2540 |
|                                          | alanine                            | 0.85        | 0.85         | 0.0019      | 0.0121 | 0.0026       | 0.0149 |
| Glutamate metabolism                     | N-acetylalanine                    | 1.05        | 1.05         | 0.1621      | 0.2446 | 0.1718       | 0.2494 |
|                                          | glutamate                          | 1.49        | 1.41         | 0.0015      | 0.0102 | 0.0025       | 0.0149 |
|                                          | glutamine                          | 0.97        | 0.99         | 0.2345      | 0.3060 | 0.4995       | 0.4746 |
|                                          | pyroglutamin                       | 1.14        | 1.15         | 0.7260      | 0.5761 | 0.6950       | 0.5436 |
|                                          | N-acetyl-aspartyl-glutamate (NAAG) | 1.13        | 1.13         | 0.0414      | 0.1034 | 0.0410       | 0.1031 |
| Histidine metabolism                     | N-acetylglutamine                  | 0.90        | 0.88         | 0.0799      | 0.1532 | 0.0595       | 0.1277 |
|                                          | histidine                          | 0.95        | 0.95         | 0.2999      | 0.3553 | 0.3303       | 0.3681 |
|                                          | N-acetylhistidine                  | 0.96        | 0.93         | 0.8743      | 0.6190 | 0.9494       | 0.6342 |
|                                          | trans-uocanate                     | 0.81        | 0.82         | 0.1595      | 0.2435 | 0.2082       | 0.2841 |
|                                          | 3-methylhistidine                  | 1.04        | 1.04         | 0.8752      | 0.6190 | 0.9054       | 0.6265 |
|                                          | N-acetyl-3-methylhistidine         | 1.12        | 1.07         | 0.8755      | 0.6190 | 0.9537       | 0.6357 |
|                                          | 1-methylhistidine                  | 0.95        | 0.94         | 0.7229      | 0.5761 | 0.6047       | 0.5206 |
|                                          | imidazole lactate                  | 1.08        | 1.06         | 0.5686      | 0.5120 | 0.7027       | 0.5454 |
|                                          | 1-methylimidazoleacetate           | 1.44        | 1.40         | 0.0107      | 0.0374 | 0.0143       | 0.0485 |
|                                          | imidazole propionate               | 0.95        | 0.94         | 0.5168      | 0.4862 | 0.4653       | 0.4593 |
| Lysine metabolism                        | N-acetyl-1-methylhistidine         | 0.98        | 0.94         | 0.7267      | 0.5761 | 0.6037       | 0.5206 |
|                                          | lysine                             | 0.90        | 0.89         | 0.0205      | 0.0625 | 0.0116       | 0.0399 |
|                                          | 2-aminoadipate                     | 1.30        | 1.30         | 0.0025      | 0.0140 | 0.0024       | 0.0145 |
|                                          | pipecolate                         | 0.88        | 0.88         | 0.1689      | 0.2528 | 0.1576       | 0.2389 |
|                                          | N-6-trimethyllysine                | 1.09        | 1.09         | 0.5744      | 0.5126 | 0.6060       | 0.5206 |
|                                          | N6-acetyllysine                    | 0.96        | 0.95         | 0.3168      | 0.3607 | 0.2178       | 0.2934 |
| Phenylalanine & tyrosine metabolism      | glutaryl carnitine (C5)            | 0.91        | 0.89         | 0.6955      | 0.5692 | 0.5666       | 0.5084 |
|                                          | phenyllactate (PLA)                | 0.94        | 0.88         | 0.3210      | 0.3607 | 0.1779       | 0.2540 |
|                                          | phenylalanine                      | 0.94        | 0.94         | 0.0941      | 0.1711 | 0.0778       | 0.1552 |
|                                          | p-cresol sulfate                   | 0.94        | 0.94         | 0.6535      | 0.5466 | 0.6167       | 0.5260 |
|                                          | o-cresol sulfate                   | 0.85        | 0.86         | 0.0145      | 0.0466 | 0.0163       | 0.0525 |

|                                           |                                      |             |             |        |        |        |        |
|-------------------------------------------|--------------------------------------|-------------|-------------|--------|--------|--------|--------|
|                                           | phenylpyruvate                       | 0.92        | 0.92        | 0.1718 | 0.2560 | 0.1706 | 0.2494 |
|                                           | gentisate                            | 1.00        | 1.00        |        |        |        |        |
|                                           | tyrosine                             | 0.97        | 0.97        | 0.6256 | 0.5326 | 0.5533 | 0.5003 |
|                                           | 3-(4-hydroxyphenyl)lactate           | 1.02        | 0.99        | 0.8095 | 0.6005 | 0.9869 | 0.6407 |
|                                           | vanillylmandelate (VMA)              | 1.09        | 1.10        | 0.5460 | 0.5041 | 0.4781 | 0.4639 |
|                                           | 4-hydroxyphenylacetate               | 0.69        | <b>0.66</b> | 0.1131 | 0.1905 | 0.0792 | 0.1563 |
|                                           | 3-methoxytyrosine                    | <b>1.13</b> | <b>1.14</b> | 0.0660 | 0.1320 | 0.0537 | 0.1182 |
|                                           | N-acetylphenylalanine                | 1.07        | 0.98        | 0.7456 | 0.5791 | 0.9914 | 0.6425 |
|                                           | N-acetyltyrosine                     | 0.98        | 0.94        | 0.5600 | 0.5080 | 0.4001 | 0.4202 |
|                                           | phenylacetylglutamine                | 0.80        | <b>0.80</b> | 0.1113 | 0.1903 | 0.0956 | 0.1782 |
|                                           | 3-(3-hydroxyphenyl)propionate        | 0.69        | 0.68        | 0.7036 | 0.5721 | 0.6570 | 0.5390 |
|                                           | 3-phenylpropionate (hydrocinnamate)  | 0.58        | 0.59        | 0.1208 | 0.1978 | 0.1448 | 0.2274 |
|                                           | phenol sulfate                       | 1.24        | 1.25        | 0.2773 | 0.3426 | 0.1917 | 0.2653 |
|                                           | 3-[3-(sulfooxy)phenyl]propanoic acid | 0.81        | 0.81        | 0.6865 | 0.5647 | 0.6723 | 0.5400 |
| Tryptophan metabolism                     | xanthurenate                         | <b>0.82</b> | 0.83        | 0.0869 | 0.1632 | 0.1066 | 0.1927 |
|                                           | kynurenate                           | 1.01        | 1.01        | 0.8629 | 0.6190 | 0.8857 | 0.6168 |
|                                           | kynurenine                           | <b>1.13</b> | <b>1.13</b> | 0.0371 | 0.0975 | 0.0412 | 0.1031 |
|                                           | tryptophan                           | 0.99        | 0.99        | 0.7373 | 0.5778 | 0.6387 | 0.5351 |
|                                           | indolelactate                        | 0.96        | 0.88        | 0.3611 | 0.3893 | 0.1776 | 0.2540 |
|                                           | indoleacetate                        | <b>0.90</b> | <b>0.90</b> | 0.0996 | 0.1762 | 0.0894 | 0.1688 |
|                                           | indolebutyrate                       | 0.76        | 0.76        | 0.4605 | 0.4568 | 0.5105 | 0.4778 |
|                                           | tryptophan betaine                   | 1.00        | 1.01        | 0.1399 | 0.2217 | 0.1265 | 0.2111 |
|                                           | serotonin (5HT)                      | <b>3.94</b> | <b>3.99</b> | 0.0000 | 0.0000 | 0.0000 | 0.0000 |
|                                           | N-acetyltryptophan                   | 1.05        | 0.96        | 0.9578 | 0.6365 | 0.7580 | 0.5740 |
|                                           | C-glycosyltryptophan                 | <b>1.12</b> | <b>1.12</b> | 0.0145 | 0.0466 | 0.0160 | 0.0520 |
|                                           | 5-hydroxyindoleacetate               | 0.65        | 0.64        | 0.2738 | 0.3395 | 0.2615 | 0.3248 |
|                                           | methyl indole-3-acetate              | 1.17        | 1.17        | 0.2383 | 0.3077 | 0.2194 | 0.2934 |
|                                           | 3-indoxyl sulfate                    | 0.94        | 0.94        | 0.5037 | 0.4804 | 0.5015 | 0.4746 |
|                                           | indolepropionate                     | 0.76        | 0.76        | 0.1600 | 0.2435 | 0.1645 | 0.2447 |
|                                           | indoleacetylglutamine                | 0.88        | 0.88        | 0.3640 | 0.3912 | 0.3475 | 0.3791 |
| Valine, leucine and isoleucine metabolism | 3-methyl-2-oxobutyrate               | 1.00        | 1.00        | 0.9402 | 0.6314 | 0.9331 | 0.6307 |
|                                           | 3-methyl-2-oxovalerate               | 0.97        | 0.95        | 0.7798 | 0.5879 | 0.6145 | 0.5253 |
|                                           | levulinate (4-oxovalerate)           | <b>0.73</b> | <b>0.73</b> | 0.0695 | 0.1378 | 0.0758 | 0.1522 |
|                                           | beta-hydroxyisovalerate              | 1.04        | 1.04        | 0.4165 | 0.4221 | 0.4226 | 0.4335 |
|                                           | alpha-hydroxyisocaproate             | 1.04        | 0.99        | 0.8453 | 0.6152 | 0.6405 | 0.5351 |
|                                           | isoleucine                           | 0.95        | 0.95        | 0.2942 | 0.3534 | 0.2226 | 0.2935 |
|                                           | leucine                              | 0.93        | 0.92        | 0.1419 | 0.2239 | 0.1140 | 0.1978 |
|                                           | N-acetylleucine                      | <b>0.91</b> | <b>0.87</b> | 0.0571 | 0.1246 | 0.0220 | 0.0663 |
|                                           | N-acetylvaline                       | 0.99        | 0.98        | 0.9989 | 0.6494 | 0.8779 | 0.6151 |
|                                           | N-acetylisoleucine                   | 1.00        | 0.96        | 0.7283 | 0.5761 | 0.5174 | 0.4804 |
|                                           | tigloylglycine                       | 0.77        | 0.78        | 0.1000 | 0.1762 | 0.1049 | 0.1908 |
|                                           | valine                               | 1.00        | 1.00        | 0.9707 | 0.6415 | 0.9843 | 0.6407 |
|                                           | 3-hydroxyisobutyrate                 | 0.91        | 0.91        | 0.3056 | 0.3588 | 0.2829 | 0.3381 |
|                                           | 4-methyl-2-oxopentanoate             | 0.97        | 0.95        | 0.7271 | 0.5761 | 0.6260 | 0.5300 |
| 3-hydroxy-2-ethylpropionate               | <b>1.18</b>                          | <b>1.19</b> | 0.0551      | 0.1210 | 0.0547 | 0.1196 |        |

|                                               |                                |             |             |        |        |        |        |
|-----------------------------------------------|--------------------------------|-------------|-------------|--------|--------|--------|--------|
|                                               | alpha-hydroxyisovalerate       | 1.19        | 1.11        | 0.2727 | 0.3395 | 0.3834 | 0.4049 |
|                                               | isovalerylglycine              | <b>0.49</b> | <b>0.49</b> | 0.0006 | 0.0053 | 0.0005 | 0.0046 |
|                                               | isobutyrylcarnitine            | <b>0.70</b> | <b>0.70</b> | 0.0076 | 0.0303 | 0.0076 | 0.0310 |
|                                               | 2-hydroxy-3-methylvalerate     | 1.04        | 0.97        | 0.9649 | 0.6393 | 0.7508 | 0.5712 |
|                                               | 2-methylbutyrylcarnitine (C5)  | 0.97        | 0.96        | 0.9394 | 0.6314 | 0.8835 | 0.6165 |
|                                               | isovalerylcarnitine            | <b>0.67</b> | <b>0.67</b> | 0.0096 | 0.0348 | 0.0089 | 0.0334 |
|                                               | hydroxyisovaleroyl carnitine   | 0.97        | 0.96        | 0.5430 | 0.5027 | 0.4970 | 0.4746 |
|                                               | tiglyl carnitine               | 0.94        | 0.93        | 0.3844 | 0.4048 | 0.3344 | 0.3702 |
|                                               | 3-methylglutarylcarnitine (C6) | 0.94        | 0.94        | 0.7515 | 0.5816 | 0.7814 | 0.5880 |
| Cysteine, methionine, SAM, taurine metabolism | cysteine                       | <b>0.89</b> | <b>0.89</b> | 0.0373 | 0.0975 | 0.0339 | 0.0914 |
|                                               | S-methylcysteine               | 1.08        | 1.09        | 0.5558 | 0.5080 | 0.5103 | 0.4778 |
|                                               | N-formylmethionine             | 0.99        | 0.99        | 0.8996 | 0.6221 | 0.9367 | 0.6307 |
|                                               | taurine                        | 1.04        | 1.05        | 0.5637 | 0.5097 | 0.5667 | 0.5084 |
|                                               | S-adenosylhomocysteine (SAH)   | <b>0.90</b> | <b>0.89</b> | 0.0604 | 0.1302 | 0.0393 | 0.1005 |
|                                               | methionine                     | <b>0.86</b> | <b>0.85</b> | 0.0026 | 0.0146 | 0.0017 | 0.0119 |
|                                               | N-acetylmethionine             | <b>0.76</b> | <b>0.76</b> | 0.0192 | 0.0592 | 0.0250 | 0.0720 |
|                                               | alpha-ketobutyrate             | <b>1.31</b> | <b>1.31</b> | 0.0400 | 0.1022 | 0.0447 | 0.1079 |
|                                               | 2-hydroxybutyrate (AHB)        | <b>1.25</b> | 1.19        | 0.0776 | 0.1507 | 0.1120 | 0.1954 |
|                                               | 4-amino-2-hydroxybutyrate      | <b>0.86</b> | <b>0.87</b> | 0.0267 | 0.0764 | 0.0379 | 0.0977 |
| Urea cycle; arginine-, proline-, metabolism   | dimethylarginine (SDMA + ADMA) | 0.98        | 0.99        | 0.6102 | 0.5262 | 0.5843 | 0.5163 |
|                                               | arginine                       | <b>1.21</b> | <b>1.20</b> | 0.0630 | 0.1314 | 0.0713 | 0.1454 |
|                                               | homoarginine                   | 0.94        | 0.92        | 0.3905 | 0.4054 | 0.3082 | 0.3537 |
|                                               | N-acetylarginine               | 0.83        | 0.82        | 0.1746 | 0.2574 | 0.1503 | 0.2338 |
|                                               | ornithine                      | <b>0.63</b> | <b>0.62</b> | 0.0000 | 0.0002 | 0.0000 | 0.0002 |
|                                               | urea                           | 0.93        | 0.93        | 0.2207 | 0.2918 | 0.2334 | 0.3008 |
|                                               | proline                        | 0.94        | 0.94        | 0.2044 | 0.2817 | 0.1797 | 0.2544 |
|                                               | citrulline                     | 0.96        | 0.95        | 0.4509 | 0.4511 | 0.3763 | 0.3987 |
|                                               | N-methyl proline               | 0.82        | 0.79        | 0.2818 | 0.3445 | 0.2349 | 0.3017 |
|                                               | trans-4-hydroxyproline         | <b>0.82</b> | <b>0.82</b> | 0.0419 | 0.1040 | 0.0496 | 0.1148 |
|                                               | homocitrulline                 | 0.87        | 0.83        | 0.3542 | 0.3842 | 0.2609 | 0.3248 |
|                                               | N-delta-acetyornithine         | 0.91        | 0.91        | 0.7136 | 0.5761 | 0.6934 | 0.5436 |
| N2,N5-diacetyornithine                        | 0.90                           | 0.88        | 0.3760      | 0.3992 | 0.3016 | 0.3517 |        |
| Creatine metabolism                           | creatine                       | 0.90        | 0.89        | 0.6057 | 0.5244 | 0.5451 | 0.4955 |
|                                               | creatinine                     | 1.02        | 1.01        | 0.7736 | 0.5864 | 0.8570 | 0.6116 |
| Butanoate metabolism                          | 2-aminobutyrate                | 1.08        | 1.08        | 0.2698 | 0.3394 | 0.2691 | 0.3296 |
| Polyamine metabolism                          | 5-methylthioadenosine (MTA)    | 0.95        | 0.94        | 0.1757 | 0.2574 | 0.1442 | 0.2274 |
|                                               | acisoga                        | <b>1.18</b> | <b>1.19</b> | 0.0794 | 0.1531 | 0.0678 | 0.1410 |
| Guanidino and acetamido metabolism            | 4-guanidinobutanoate           | <b>0.76</b> | <b>0.75</b> | 0.0062 | 0.0258 | 0.0044 | 0.0210 |
|                                               | 4-acetamidobutanoate           | 0.96        | 0.96        | 0.7763 | 0.5872 | 0.6850 | 0.5436 |
| Glutathione metabolism                        | 5-oxoproline                   | <b>0.86</b> | <b>0.86</b> | 0.0271 | 0.0764 | 0.0286 | 0.0804 |
|                                               | cysteine-glutathione disulfide | <b>0.56</b> | <b>0.57</b> | 0.0012 | 0.0086 | 0.0015 | 0.0109 |
| Dipeptide                                     | glycylvaline                   | 1.00        | 1.00        |        |        |        |        |
|                                               | glycylleucine                  | <b>0.80</b> | <b>0.80</b> | 0.0994 | 0.1762 | 0.0989 | 0.1817 |
|                                               | asparagylleucine               | 1.16        | 1.14        | 0.3370 | 0.3726 | 0.4043 | 0.4232 |
|                                               | isoleucylaspartate             | 1.07        | 1.07        | 0.1799 | 0.2609 | 0.1608 | 0.2404 |



|                      |                                |             |             |        |        |        |        |
|----------------------|--------------------------------|-------------|-------------|--------|--------|--------|--------|
|                      | isoleucylisoleucine            | 1.08        | 1.08        | 0.4310 | 0.4350 | 0.4585 | 0.4564 |
|                      | isoleucylleucine               | <b>1.18</b> | <b>1.18</b> | 0.0223 | 0.0659 | 0.0221 | 0.0663 |
|                      | leucylleucine                  | <b>4.78</b> | <b>4.60</b> | 0.0000 | 0.0000 | 0.0000 | 0.0000 |
|                      | pro-hydroxy-pro                | 0.99        | 0.99        | 0.9031 | 0.6230 | 0.9354 | 0.6307 |
|                      | phenylalanylphenylalanine      | 0.10        | 0.10        | 0.6443 | 0.5416 | 0.6327 | 0.5343 |
|                      | phenylalanylalanine            | 1.16        | 1.15        | 0.2892 | 0.3486 | 0.3321 | 0.3688 |
|                      | phenylalanylvaline             | 0.91        | 0.91        | 0.9963 | 0.6494 | 0.9996 | 0.6466 |
|                      | phenylalanylglycine            | <b>0.72</b> | <b>0.72</b> | 0.0612 | 0.1309 | 0.0708 | 0.1454 |
|                      | phenylalanylmethionine         | 1.01        | 1.02        | 0.9212 | 0.6285 | 0.8244 | 0.6046 |
|                      | pyroglutamylglutamine          | 1.03        | 1.03        | 0.3090 | 0.3600 | 0.3107 | 0.3541 |
|                      | pyroglutamylvaline             | <b>1.20</b> | <b>1.19</b> | 0.0309 | 0.0860 | 0.0362 | 0.0950 |
|                      | cyclo(L-phe-L-pro)             | 1.15        | 0.97        | 0.2064 | 0.2817 | 0.2863 | 0.3398 |
|                      | cyclo(gly-pro)                 | 0.88        | 0.85        | 0.3180 | 0.3607 | 0.2410 | 0.3082 |
|                      | cyclo(leu-pro)                 | 1.08        | 0.95        | 0.5707 | 0.5120 | 0.7168 | 0.5527 |
|                      | valylleucine                   | 1.08        | 1.09        | 0.2227 | 0.2918 | 0.1920 | 0.2653 |
|                      | aspartylleucine                | 0.64        | 0.64        | 0.3009 | 0.3553 | 0.3025 | 0.3517 |
|                      | histidylalanine                | 1.48        | 1.41        | 0.3857 | 0.4048 | 0.5420 | 0.4940 |
|                      | histidyltryptophan             | 0.63        | 0.63        | 0.1362 | 0.2179 | 0.1576 | 0.2389 |
|                      | methionylalanine               | 3.67        | 3.50        | 0.2794 | 0.3440 | 0.3615 | 0.3854 |
|                      | isoleucylalanine               | <b>1.28</b> | <b>1.27</b> | 0.0084 | 0.0327 | 0.0102 | 0.0357 |
|                      | isoleucylglycine               | 1.11        | 1.11        | 0.1289 | 0.2090 | 0.1332 | 0.2170 |
|                      | isoleucylphenylalanine         | 1.08        | 1.08        | 0.3871 | 0.4048 | 0.4099 | 0.4239 |
|                      | isoleucylvaline                | 0.99        | 0.96        | 0.7009 | 0.5712 | 0.8037 | 0.5953 |
|                      | leucylglutamate                | <b>1.39</b> | <b>1.40</b> | 0.0034 | 0.0171 | 0.0030 | 0.0163 |
|                      | leucylglycine                  | 0.94        | 0.92        | 0.6024 | 0.5229 | 0.6907 | 0.5436 |
|                      | leucylphenylalanine            | 0.95        | 0.94        | 0.6139 | 0.5262 | 0.6768 | 0.5411 |
|                      | phenylalanylleucine            | 0.49        | 0.50        | 0.7194 | 0.5761 | 0.7395 | 0.5663 |
|                      | phenylalanylisoleucine         | 1.08        | 1.09        | 0.6440 | 0.5416 | 0.5404 | 0.4940 |
|                      | serylleucine                   | 1.27        | 1.26        | 0.1160 | 0.1936 | 0.1385 | 0.2204 |
|                      | tryptophylleucine              | 0.92        | 0.92        | 0.2141 | 0.2862 | 0.1920 | 0.2653 |
|                      | tryptophylasparagine           | <b>3.58</b> | 3.55        | 0.0967 | 0.1731 | 0.1234 | 0.2080 |
|                      | tryptophylphenylalanine        | 1.09        | 1.08        | 0.1788 | 0.2608 | 0.2089 | 0.2841 |
|                      | phenylalanyltryptophan         | 1.04        | 1.02        | 0.2361 | 0.3070 | 0.2710 | 0.3307 |
|                      | tryptophylglutamate            | <b>0.84</b> | <b>0.84</b> | 0.0049 | 0.0220 | 0.0056 | 0.0245 |
| Dipeptide derivative | carosine                       | 1.00        | 1.00        |        |        |        |        |
|                      | anserine                       | 1.00        | 1.00        |        |        |        |        |
|                      | cys-gly, oxidized              | <b>0.60</b> | <b>0.61</b> | 0.0000 | 0.0006 | 0.0001 | 0.0010 |
|                      | N-acetylcarnosine              | 1.00        | 0.99        | 0.9475 | 0.6338 | 0.9793 | 0.6394 |
| gamma-glutamyl       | gamma-glutamylvaline           | <b>1.27</b> | <b>1.27</b> | 0.0167 | 0.0521 | 0.0160 | 0.0520 |
|                      | gamma-glutamyl-2-aminobutyrate | <b>0.88</b> | 0.90        | 0.0622 | 0.1314 | 0.1087 | 0.1935 |
|                      | gamma-glutamylleucine          | 0.99        | 1.00        | 0.6191 | 0.5294 | 0.8415 | 0.6068 |
|                      | gamma-glutamylisoleucine       | 1.14        | 1.13        | 0.2069 | 0.2817 | 0.2561 | 0.3216 |
|                      | gamma-glutamylmethionine       | <b>0.68</b> | <b>0.69</b> | 0.0000 | 0.0001 | 0.0000 | 0.0002 |
|                      | gamma-glutamylglutamate        | <b>1.31</b> | <b>1.33</b> | 0.0510 | 0.1164 | 0.0328 | 0.0899 |
|                      | gamma-glutamylglutamine        | <b>0.71</b> | <b>0.72</b> | 0.0002 | 0.0020 | 0.0003 | 0.0033 |

|                                                              |                                                     |              |              |        |        |        |        |
|--------------------------------------------------------------|-----------------------------------------------------|--------------|--------------|--------|--------|--------|--------|
|                                                              | gamma-glutamylphenylalanine                         | 0.97         | 0.98         | 0.6137 | 0.5262 | 0.8137 | 0.5980 |
|                                                              | gamma-glutamyltyrosine                              | 0.97         | 0.99         | 0.5823 | 0.5137 | 0.8747 | 0.6151 |
|                                                              | gamma-glutamyltryptophan                            | 0.93         | 0.94         | 0.1146 | 0.1921 | 0.2219 | 0.2935 |
|                                                              | gamma-glutamyllysine                                | 1.03         | 1.04         | 0.9826 | 0.6437 | 0.8326 | 0.6064 |
|                                                              | gamma-glutamylalanine                               | <b>0.64</b>  | <b>0.65</b>  | 0.0000 | 0.0001 | 0.0000 | 0.0000 |
| Polypeptide                                                  | bradykinin                                          | 1.13         | 1.06         | 0.3344 | 0.3721 | 0.2657 | 0.3290 |
|                                                              | bradykinin, hydroxy-pro(3)                          | 0.98         | 0.96         | 0.3153 | 0.3607 | 0.2670 | 0.3294 |
|                                                              | bradykinin, des-arg(9)                              | 1.19         | 1.09         | 0.3717 | 0.3958 | 0.2933 | 0.3434 |
|                                                              | HXGXA                                               | 4.49         | 3.66         | 0.1757 | 0.2574 | 0.2753 | 0.3317 |
|                                                              | HWESASXX                                            | <b>5.25</b>  | <b>4.81</b>  | 0.0000 | 0.0002 | 0.0000 | 0.0003 |
|                                                              | XHWESASXXR                                          | <b>68.71</b> | <b>22.31</b> | 0.0019 | 0.0122 | 0.0034 | 0.0174 |
|                                                              | HWESASLLR                                           | <b>11.75</b> | <b>9.86</b>  | 0.0006 | 0.0053 | 0.0011 | 0.0086 |
| Aminosugars metabolism                                       | erythronate                                         | 1.03         | 1.02         | 0.5601 | 0.5080 | 0.6260 | 0.5300 |
|                                                              | fucose                                              | <b>1.35</b>  | <b>1.34</b>  | 0.0154 | 0.0492 | 0.0187 | 0.0586 |
| Fructose, mannose, galactose, starch, and sucrose metabolism | fructose                                            | <b>0.78</b>  | <b>0.79</b>  | 0.0137 | 0.0449 | 0.0195 | 0.0607 |
|                                                              | maltose                                             | 1.57         | 1.55         | 0.2433 | 0.3117 | 0.2794 | 0.3351 |
|                                                              | mannitol                                            | 1.07         | 1.04         | 0.8470 | 0.6152 | 0.7485 | 0.5707 |
|                                                              | mannose                                             | <b>1.33</b>  | <b>1.34</b>  | 0.0012 | 0.0086 | 0.0009 | 0.0077 |
|                                                              | sucrose                                             | <b>0.52</b>  | <b>0.52</b>  | 0.0024 | 0.0136 | 0.0022 | 0.0142 |
|                                                              | methyl-beta-glucopyranoside                         | 0.85         | 0.85         | 0.1953 | 0.2723 | 0.1836 | 0.2577 |
| Glycolysis, gluconeogenesis, pyruvate metabolism             | 1,5-anhydroglucitol (1,5-AG)                        | 1.06         | 1.07         | 0.3659 | 0.3921 | 0.2552 | 0.3216 |
|                                                              | glycerate                                           | 1.03         | 1.03         | 0.8958 | 0.6221 | 0.9216 | 0.6280 |
|                                                              | glucose                                             | 1.06         | 1.06         | 0.1385 | 0.2205 | 0.1294 | 0.2139 |
|                                                              | 1,6-anhydroglucose                                  | <b>0.56</b>  | <b>0.53</b>  | 0.0040 | 0.0184 | 0.0024 | 0.0145 |
|                                                              | 3-phosphoglycerate (isobar with 2-phosphoglycerate) | <b>1.76</b>  | <b>1.75</b>  | 0.0520 | 0.1172 | 0.0636 | 0.1347 |
|                                                              | pyruvate                                            | <b>0.66</b>  | <b>0.67</b>  | 0.0015 | 0.0102 | 0.0022 | 0.0143 |
|                                                              | lactate                                             | <b>0.69</b>  | <b>0.69</b>  | 0.0000 | 0.0000 | 0.0000 | 0.0000 |
| Glyoxylate and dicarboxylate metabolism                      | oxalate (ethanedioate)                              | <b>0.75</b>  | <b>0.75</b>  | 0.0005 | 0.0047 | 0.0005 | 0.0046 |
| Nucleotide sugars, pentose metabolism                        | arabitol                                            | 1.06         | 1.02         | 0.5994 | 0.5215 | 0.7627 | 0.5752 |
|                                                              | threitol                                            | <b>0.78</b>  | <b>0.78</b>  | 0.0496 | 0.1147 | 0.0450 | 0.1080 |
|                                                              | gluconate                                           | <b>0.86</b>  | <b>0.87</b>  | 0.0647 | 0.1320 | 0.0974 | 0.1799 |
|                                                              | xylitol                                             | 2.14         | 1.14         | 0.1837 | 0.2614 | 0.3502 | 0.3791 |
|                                                              | arabinose                                           | 1.00         | 0.95         | 0.7620 | 0.5843 | 0.5855 | 0.5163 |
|                                                              | xylonate                                            | 1.00         | 1.00         | 0.8308 | 0.6085 | 0.8808 | 0.6158 |
| Krebs cycle                                                  | citrate                                             | 0.95         | 0.94         | 0.4504 | 0.4511 | 0.4294 | 0.4388 |
|                                                              | alpha-ketoglutarate                                 | 1.41         | 1.40         | 0.2064 | 0.2817 | 0.2300 | 0.2987 |
|                                                              | succinate                                           | <b>1.24</b>  | <b>1.20</b>  | 0.0029 | 0.0156 | 0.0052 | 0.0239 |
|                                                              | succinylcarnitine                                   | 1.11         | 1.07         | 0.3126 | 0.3607 | 0.4668 | 0.4593 |
|                                                              | malate                                              | <b>0.84</b>  | <b>0.83</b>  | 0.0045 | 0.0206 | 0.0038 | 0.0193 |
| Oxidative phosphorylation                                    | acetylphosphate                                     | 1.08         | 1.08         | 0.1443 | 0.2256 | 0.1481 | 0.2315 |
|                                                              | phosphate                                           | 1.04         | 1.04         | 0.3059 | 0.3588 | 0.2882 | 0.3409 |
| Essential fatty acid                                         | linoleate (18:2n6)                                  | <b>1.48</b>  | <b>1.48</b>  | 0.0004 | 0.0041 | 0.0005 | 0.0046 |
|                                                              | linolenate [alpha or gamma; (18:3n3 or 6)]          | <b>1.57</b>  | <b>1.55</b>  | 0.0011 | 0.0086 | 0.0014 | 0.0104 |

|                          |                                    |                   |             |        |        |        |        |
|--------------------------|------------------------------------|-------------------|-------------|--------|--------|--------|--------|
|                          | dihomo-linolenate (20:3n3 or n6)   | <b>1.50</b>       | <b>1.49</b> | 0.0000 | 0.0005 | 0.0000 | 0.0007 |
|                          | eicosapentaenoate (EPA; 20:5n3)    | <b>1.66</b>       | <b>1.61</b> | 0.0016 | 0.0109 | 0.0023 | 0.0145 |
|                          | docosapentaenoate (n3 DPA; 22:5n3) | <b>1.86</b>       | <b>1.83</b> | 0.0001 | 0.0011 | 0.0001 | 0.0015 |
|                          | docosapentaenoate (n6 DPA; 22:5n6) | <b>1.41</b>       | <b>1.38</b> | 0.0022 | 0.0129 | 0.0029 | 0.0160 |
|                          | docosahexaenoate (DHA; 22:6n3)     | <b>1.40</b>       | <b>1.36</b> | 0.0125 | 0.0417 | 0.0177 | 0.0561 |
| Short chain fatty acid   | valerate                           | 1.06              | 1.04        | 0.5901 | 0.5147 | 0.6654 | 0.5395 |
| Medium chain fatty acid  | caproate (6:0)                     | <b>0.88</b>       | <b>0.87</b> | 0.0102 | 0.0365 | 0.0062 | 0.0262 |
|                          | caprylate (8:0)                    | <b>0.73</b>       | <b>0.72</b> | 0.0638 | 0.1318 | 0.0498 | 0.1148 |
|                          | pelargonate (9:0)                  | <b>0.89</b>       | <b>0.88</b> | 0.0283 | 0.0791 | 0.0233 | 0.0676 |
|                          | caprate (10:0)                     | 0.90              | 0.88        | 0.7321 | 0.5764 | 0.6382 | 0.5351 |
|                          | 10-undecenoate (11:1n1)            | <b>1.65</b>       | <b>1.66</b> | 0.0000 | 0.0003 | 0.0000 | 0.0003 |
|                          | laurate (12:0)                     | <b>1.24</b>       | <b>1.21</b> | 0.0382 | 0.0983 | 0.0519 | 0.1171 |
|                          | 5-dodecenoate (12:1n7)             | <b>2.11</b>       | <b>2.11</b> | 0.0000 | 0.0003 | 0.0000 | 0.0004 |
|                          | 2-aminoheptanoate                  | <b>1.32</b>       | <b>1.32</b> | 0.0010 | 0.0081 | 0.0009 | 0.0072 |
| Long chain fatty acid    | myristate (14:0)                   | <b>1.49</b>       | <b>1.46</b> | 0.0001 | 0.0009 | 0.0001 | 0.0014 |
|                          | myristoleate (14:1n5)              | <b>2.41</b>       | <b>2.38</b> | 0.0000 | 0.0001 | 0.0000 | 0.0001 |
|                          | pentadecanoate (15:0)              | <b>1.51</b>       | <b>1.50</b> | 0.0002 | 0.0017 | 0.0002 | 0.0024 |
|                          | palmitate (16:0)                   | <b>1.21</b>       | <b>1.21</b> | 0.0029 | 0.0156 | 0.0039 | 0.0193 |
|                          | palmitoleate (16:1n7)              | <b>1.94</b>       | <b>1.90</b> | 0.0000 | 0.0002 | 0.0000 | 0.0003 |
|                          | margarate (17:0)                   | <b>1.25</b>       | <b>1.23</b> | 0.0054 | 0.0239 | 0.0079 | 0.0316 |
|                          | 10-heptadecenoate (17:1n7)         | <b>1.84</b>       | <b>1.80</b> | 0.0000 | 0.0004 | 0.0000 | 0.0005 |
|                          | stearate (18:0)                    | <b>1.20</b>       | <b>1.19</b> | 0.0121 | 0.0410 | 0.0155 | 0.0515 |
|                          | oleate (18:1n9)                    | <b>1.75</b>       | <b>1.73</b> | 0.0001 | 0.0009 | 0.0001 | 0.0012 |
|                          | cis-vaccenate (18:1n7)             | <b>1.63</b>       | <b>1.60</b> | 0.0005 | 0.0048 | 0.0007 | 0.0062 |
|                          | stearidonate (18:4n3)              | <b>1.27</b>       | <b>1.25</b> | 0.0409 | 0.1034 | 0.0497 | 0.1148 |
|                          | 10-nonadecenoate (19:1n9)          | <b>1.73</b>       | <b>1.69</b> | 0.0001 | 0.0008 | 0.0001 | 0.0011 |
|                          | eicosenoate (20:1n9 or 11)         | <b>1.51</b>       | <b>1.48</b> | 0.0009 | 0.0075 | 0.0013 | 0.0098 |
|                          | dihomo-linoleate (20:2n6)          | <b>1.42</b>       | <b>1.39</b> | 0.0016 | 0.0109 | 0.0022 | 0.0142 |
|                          | mead acid (20:3n9)                 | <b>1.79</b>       | <b>1.73</b> | 0.0000 | 0.0003 | 0.0000 | 0.0004 |
|                          | arachidonate (20:4n6)              | <b>1.50</b>       | <b>1.48</b> | 0.0001 | 0.0008 | 0.0001 | 0.0012 |
|                          | docosadienoate (22:2n6)            | <b>1.31</b>       | <b>1.26</b> | 0.0056 | 0.0239 | 0.0081 | 0.0319 |
|                          | docosatrienoate (22:3n3)           | <b>1.36</b>       | <b>1.28</b> | 0.0037 | 0.0179 | 0.0058 | 0.0248 |
|                          |                                    | adrenate (22:4n6) | 1.07        | 1.07   | 0.2144 | 0.2862 | 0.2418 |
| Fatty acid, methyl ester | palmitate, methyl ester            | 1.35              | 1.37        | 0.2995 | 0.3553 | 0.2915 | 0.3434 |
|                          | margarate, methyl ester            | 1.14              | 1.16        | 0.5229 | 0.4893 | 0.4990 | 0.4746 |
|                          | stearate, methyl ester             | 1.16              | 1.17        | 0.7419 | 0.5780 | 0.6988 | 0.5436 |
|                          | oleate, methyl ester               | 1.31              | 1.33        | 0.4554 | 0.4530 | 0.4339 | 0.4416 |
|                          | linoleate, methyl ester            | 1.14              | 1.16        | 0.5153 | 0.4861 | 0.4822 | 0.4653 |
| Fatty acid, monohydroxy  | 3-hydroxypropanoate                | 0.91              | 0.90        | 0.2486 | 0.3173 | 0.2037 | 0.2802 |
|                          | 2-hydroxyoctanoate                 | 1.08              | 1.08        | 0.4793 | 0.4674 | 0.5072 | 0.4774 |
|                          | 3-hydroxyoctanoate                 | 1.11              | 1.11        | 0.2211 | 0.2918 | 0.2295 | 0.2987 |
|                          | 2-hydroxydecanoate                 | 0.94              | 0.92        | 0.3355 | 0.3721 | 0.2756 | 0.3317 |
|                          | 3-hydroxydecanoate                 | <b>1.36</b>       | <b>1.37</b> | 0.0209 | 0.0631 | 0.0219 | 0.0663 |
|                          | 2-hydroxystearate                  | <b>1.12</b>       | <b>1.11</b> | 0.0224 | 0.0659 | 0.0279 | 0.0790 |
|                          | 2-hydroxypalmitate                 | <b>1.24</b>       | <b>1.23</b> | 0.0005 | 0.0048 | 0.0008 | 0.0065 |

|                                              |                                                      |                  |             |        |        |        |        |
|----------------------------------------------|------------------------------------------------------|------------------|-------------|--------|--------|--------|--------|
|                                              | 3-hydroxysebacate                                    | 1.24             | 1.24        | 0.4817 | 0.4685 | 0.5129 | 0.4788 |
|                                              | 13-HODE + 9-HODE                                     | <b>2.11</b>      | <b>1.96</b> | 0.0193 | 0.0592 | 0.0338 | 0.0914 |
| Fatty acid, dicarboxylate                    | 2-hydroxyglutarate                                   | 1.13             | 1.07        | 0.3506 | 0.3828 | 0.4714 | 0.4607 |
|                                              | suberate (octanedioate)                              | 1.07             | 1.07        | 0.5879 | 0.5147 | 0.5967 | 0.5192 |
|                                              | azelate (nonanedioate)                               | <b>0.43</b>      | <b>0.42</b> | 0.0000 | 0.0000 | 0.0000 | 0.0000 |
|                                              | dodecanedioate                                       | 0.86             | 0.86        | 0.5090 | 0.4841 | 0.5008 | 0.4746 |
|                                              | octadecanedioate                                     | 0.91             | 0.91        | 0.8720 | 0.6190 | 0.9122 | 0.6265 |
|                                              | 3-carboxy-4-methyl-5-propyl-2-furanpropanoate (CMPF) | 1.24             | 1.22        | 0.4085 | 0.4183 | 0.3540 | 0.3821 |
|                                              | Fatty acid, amino                                    | 2-aminooctanoate | 1.08        | 1.09   | 0.7541 | 0.5817 | 0.6918 |
| Fatty acid, branched                         | 15-methylpalmitate (isobar with 2-methylpalmitate)   | <b>1.31</b>      | <b>1.29</b> | 0.0013 | 0.0094 | 0.0018 | 0.0119 |
| Eicosanoid                                   | leukotriene B4                                       | 1.03             | 1.01        | 0.1515 | 0.2348 | 0.3043 | 0.3527 |
|                                              | prostaglandin E2                                     | 2.15             | 1.95        | 0.5489 | 0.5055 | 0.3425 | 0.3767 |
|                                              | 5-HETE                                               | <b>1.04</b>      | 1.02        | 0.0966 | 0.1731 | 0.1672 | 0.2468 |
| Endocannabinoid                              | N-stearoyltaurine                                    | <b>1.34</b>      | <b>1.32</b> | 0.0038 | 0.0179 | 0.0057 | 0.0247 |
|                                              | N-palmitoyltaurine                                   | <b>1.34</b>      | <b>1.31</b> | 0.0380 | 0.0983 | 0.0482 | 0.1133 |
| Fatty acid metabolism (also BCAA metabolism) | propionylcarnitine                                   | 0.89             | 0.88        | 0.1670 | 0.2510 | 0.1592 | 0.2396 |
|                                              | butyrylcarnitine                                     | <b>1.35</b>      | <b>1.35</b> | 0.0076 | 0.0303 | 0.0087 | 0.0330 |
|                                              | hydroxybutyrylcarnitine                              | <b>1.73</b>      | <b>1.68</b> | 0.0031 | 0.0163 | 0.0044 | 0.0210 |
|                                              | butyrylglycine                                       | 1.06             | 1.07        | 0.2828 | 0.3445 | 0.2595 | 0.3248 |
| Fatty acid metabolism                        | valerylcarnitine                                     | 1.04             | 1.05        | 0.4635 | 0.4573 | 0.4230 | 0.4335 |
|                                              | isovalerate                                          | <b>1.74</b>      | 1.45        | 0.0889 | 0.1650 | 0.1595 | 0.2396 |
| Carnitine metabolism                         | deoxycarnitine                                       | 0.96             | 0.96        | 0.5830 | 0.5137 | 0.5357 | 0.4934 |
|                                              | carnitine                                            | 1.06             | 1.05        | 0.1202 | 0.1978 | 0.1411 | 0.2236 |
|                                              | acetylcarnitine                                      | <b>1.21</b>      | <b>1.20</b> | 0.0032 | 0.0164 | 0.0048 | 0.0223 |
|                                              | hexanoylcarnitine                                    | <b>1.12</b>      | <b>1.13</b> | 0.0235 | 0.0679 | 0.0204 | 0.0628 |
|                                              | 2-methylmalonyl carnitine                            | 1.01             | 1.01        | 0.8648 | 0.6190 | 0.8458 | 0.6074 |
|                                              | octanoylcarnitine                                    | <b>1.07</b>      | <b>1.08</b> | 0.0436 | 0.1068 | 0.0363 | 0.0950 |
|                                              | decanoylcarnitine                                    | <b>1.31</b>      | <b>1.32</b> | 0.0108 | 0.0374 | 0.0090 | 0.0334 |
|                                              | cis-4-decenoyl carnitine                             | <b>1.10</b>      | <b>1.11</b> | 0.0345 | 0.0919 | 0.0265 | 0.0756 |
|                                              | laurylcarnitine                                      | <b>1.59</b>      | <b>1.60</b> | 0.0035 | 0.0174 | 0.0033 | 0.0172 |
|                                              | myristoylcarnitine                                   | <b>1.48</b>      | <b>1.49</b> | 0.0093 | 0.0344 | 0.0100 | 0.0357 |
|                                              | palmitoylcarnitine                                   | <b>1.22</b>      | <b>1.22</b> | 0.0661 | 0.1320 | 0.0720 | 0.1454 |
|                                              | stearoylcarnitine                                    | 1.09             | 1.09        | 0.2391 | 0.3077 | 0.2485 | 0.3143 |
|                                              | oleoylcarnitine                                      | 1.00             | 0.99        | 0.8009 | 0.5988 | 0.8620 | 0.6126 |
| Bile acid metabolism                         | cholate                                              | 0.43             | 0.42        | 0.2727 | 0.3395 | 0.2444 | 0.3104 |
|                                              | glycocholate                                         | <b>0.93</b>      | <b>0.89</b> | 0.0332 | 0.0907 | 0.0226 | 0.0669 |
|                                              | glycohyocholate                                      | 1.98             | 2.01        | 0.1244 | 0.2027 | 0.1275 | 0.2117 |
|                                              | taurocholate                                         | 2.37             | 2.31        | 0.3908 | 0.4054 | 0.3103 | 0.3541 |
|                                              | taurochenodeoxycholate                               | 2.11             | <b>2.07</b> | 0.1103 | 0.1896 | 0.0813 | 0.1582 |
|                                              | taurodeoxycholate                                    | <b>0.86</b>      | <b>0.79</b> | 0.0087 | 0.0333 | 0.0054 | 0.0244 |
|                                              | glycodeoxycholate                                    | <b>0.67</b>      | <b>0.61</b> | 0.0007 | 0.0059 | 0.0004 | 0.0037 |
|                                              | glycochenodeoxycholate                               | <b>0.97</b>      | <b>0.94</b> | 0.0028 | 0.0152 | 0.0017 | 0.0118 |
|                                              | glycolithocholate sulfate                            | <b>0.96</b>      | <b>0.95</b> | 0.0886 | 0.1650 | 0.0782 | 0.1552 |
|                                              | tauroolithocholate 3-sulfate                         | 1.14             | 1.14        | 0.1827 | 0.2609 | 0.1715 | 0.2494 |

|                         |                                                  |             |             |        |        |        |        |
|-------------------------|--------------------------------------------------|-------------|-------------|--------|--------|--------|--------|
|                         | glycocholate sulfate                             | 1.06        | 1.06        | 0.7705 | 0.5855 | 0.7895 | 0.5889 |
|                         | taurocholate sulfate                             | 1.38        | 1.39        | 0.7134 | 0.5761 | 0.7093 | 0.5481 |
|                         | glycoursodeoxycholate                            | <b>0.73</b> | <b>0.68</b> | 0.0475 | 0.1128 | 0.0328 | 0.0899 |
|                         | tauroursodeoxycholate                            | 2.36        | 2.11        | 0.9807 | 0.6437 | 0.8303 | 0.6063 |
| Glycerolipid metabolism | glycerol                                         | <b>1.36</b> | <b>1.33</b> | 0.0000 | 0.0003 | 0.0000 | 0.0005 |
|                         | choline                                          | <b>0.87</b> | <b>0.87</b> | 0.0031 | 0.0163 | 0.0028 | 0.0157 |
|                         | glycerol 3-phosphate (G3P)                       | 1.22        | 1.24        | 0.5581 | 0.5080 | 0.5380 | 0.4940 |
|                         | glycerophosphorylcholine (GPC)                   | <b>1.36</b> | <b>1.34</b> | 0.0157 | 0.0496 | 0.0224 | 0.0667 |
|                         | 1-myristoleoylglycerophosphocholine (14:1)       | 1.13        | 1.09        | 0.7170 | 0.5761 | 0.8428 | 0.6068 |
| Inositol metabolism     | myo-inositol                                     | 1.00        | 1.00        | 0.8910 | 0.6221 | 0.9233 | 0.6280 |
|                         | chiro-inositol                                   | 0.98        | 0.97        | 0.1825 | 0.2609 | 0.1521 | 0.2356 |
|                         | scyllo-inositol                                  | 0.97        | 0.94        | 0.8841 | 0.6221 | 0.7856 | 0.5886 |
| Ketone bodies           | 3-hydroxybutyrate (BHBA)                         | <b>2.19</b> | <b>2.19</b> | 0.0065 | 0.0265 | 0.0081 | 0.0319 |
| Lysolipid               | 1-palmitoylglycerophosphoethanolamine            | 1.08        | 1.06        | 0.3568 | 0.3859 | 0.4389 | 0.4431 |
|                         | 2-palmitoylglycerophosphoethanolamine            | <b>1.17</b> | 1.15        | 0.0860 | 0.1623 | 0.1074 | 0.1932 |
|                         | 1-palmitoleoylglycerophosphoethanolamine         | 1.27        | 1.23        | 0.5813 | 0.5137 | 0.6985 | 0.5436 |
|                         | 1-margaroylglycerophosphoethanolamine*           | 1.05        | 1.03        | 0.6118 | 0.5262 | 0.7093 | 0.5481 |
|                         | 1-stearoylglycerophosphoethanolamine             | <b>1.18</b> | <b>1.16</b> | 0.0656 | 0.1320 | 0.0893 | 0.1688 |
|                         | 2-stearoylglycerophosphoethanolamine             | 0.75        | 0.74        | 0.7373 | 0.5778 | 0.6789 | 0.5415 |
|                         | 1-oleoylglycerophosphoethanolamine               | 0.98        | 0.94        | 0.9215 | 0.6285 | 0.7525 | 0.5712 |
|                         | 2-oleoylglycerophosphoethanolamine               | 0.93        | 0.90        | 0.9821 | 0.6437 | 0.8641 | 0.6128 |
|                         | 1-linoleoylglycerophosphoethanolamine            | 0.93        | 0.92        | 0.5032 | 0.4804 | 0.4604 | 0.4570 |
|                         | 2-linoleoylglycerophosphoethanolamine            | 0.98        | 0.98        | 0.6275 | 0.5326 | 0.6006 | 0.5200 |
|                         | 1-arachidonoylglycerophosphoethanolamine         | 1.12        | 1.11        | 0.3453 | 0.3782 | 0.4075 | 0.4233 |
|                         | 2-arachidonoylglycerophosphoethanolamine         | 1.10        | 1.09        | 0.7402 | 0.5780 | 0.8126 | 0.5980 |
|                         | 2-docosahexaenoylglycerophosphoethanolamine      | 1.14        | 1.11        | 0.5409 | 0.5027 | 0.6370 | 0.5351 |
|                         | 1-myristoylglycerophosphocholine (14:0)          | 1.28        | 1.24        | 0.1746 | 0.2574 | 0.2277 | 0.2979 |
|                         | 2-myristoylglycerophosphocholine                 | <b>1.36</b> | <b>1.33</b> | 0.0632 | 0.1314 | 0.0842 | 0.1607 |
|                         | 1-pentadecanoylglycerophosphocholine (15:0)      | <b>1.18</b> | <b>1.17</b> | 0.0507 | 0.1164 | 0.0573 | 0.1237 |
|                         | 1-palmitoylglycerophosphocholine (16:0)          | 1.04        | 1.04        | 0.3153 | 0.3607 | 0.3453 | 0.3786 |
|                         | 2-palmitoylglycerophosphocholine                 | 1.16        | 1.16        | 0.1029 | 0.1795 | 0.1210 | 0.2050 |
|                         | 1-palmitoleoylglycerophosphocholine (16:1)       | <b>1.27</b> | <b>1.24</b> | 0.0487 | 0.1145 | 0.0685 | 0.1417 |
|                         | 2-palmitoleoylglycerophosphocholine              | 1.21        | 1.17        | 0.3810 | 0.4033 | 0.4812 | 0.4653 |
|                         | 1-margaroylglycerophosphocholine (17:0)          | 0.97        | 0.97        | 0.9534 | 0.6365 | 0.9618 | 0.6369 |
|                         | 1-stearoylglycerophosphocholine (18:0)           | 1.04        | 1.02        | 0.8669 | 0.6190 | 0.9443 | 0.6321 |
|                         | 2-stearoylglycerophosphocholine                  | 0.94        | 0.93        | 0.9777 | 0.6437 | 0.9762 | 0.6394 |
|                         | 1-oleoylglycerophosphocholine (18:1)             | 1.07        | 1.06        | 0.4105 | 0.4191 | 0.4658 | 0.4593 |
|                         | 2-oleoylglycerophosphocholine                    | 1.05        | 1.04        | 0.5118 | 0.4843 | 0.5754 | 0.5122 |
|                         | 1-linoleoylglycerophosphocholine (18:2n6)        | 0.97        | 0.97        | 0.7707 | 0.5855 | 0.7911 | 0.5889 |
|                         | 2-linoleoylglycerophosphocholine                 | 0.98        | 0.98        | 0.8942 | 0.6221 | 0.9124 | 0.6265 |
|                         | 1-arachidoylglycerophosphocholine (20:0)         | 0.49        | 0.49        | 0.2733 | 0.3395 | 0.2740 | 0.3317 |
|                         | 1-dihomo-linoleoylglycerophosphocholine (20:2n6) | 0.99        | 0.99        | 0.9464 | 0.6338 | 0.9707 | 0.6386 |
|                         | 1-eicosatrienoylglycerophosphocholine (20:3)     | 1.13        | 1.13        | 0.2097 | 0.2827 | 0.2193 | 0.2934 |
|                         | 2-eicosatrienoylglycerophosphocholine            | <b>1.21</b> | <b>1.21</b> | 0.0521 | 0.1172 | 0.0616 | 0.1314 |

|                  |                                                  |      |      |        |        |        |        |
|------------------|--------------------------------------------------|------|------|--------|--------|--------|--------|
|                  | 1-arachidonoylglycerophosphocholine (20:4n6)     | 1.13 | 1.12 | 0.1985 | 0.2757 | 0.2201 | 0.2934 |
|                  | 2-arachidonoylglycerophosphocholine              | 1.08 | 1.08 | 0.4988 | 0.4804 | 0.5407 | 0.4940 |
|                  | 1-docosapentaenoylglycerophosphocholine (22:5n3) | 1.13 | 1.13 | 0.3160 | 0.3607 | 0.3388 | 0.3739 |
|                  | 1-docosahexaenoylglycerophosphocholine (22:6n3)  | 1.21 | 1.19 | 0.0632 | 0.1314 | 0.0799 | 0.1569 |
|                  | 2-docosahexaenoylglycerophosphocholine           | 1.15 | 1.13 | 0.2516 | 0.3200 | 0.2932 | 0.3434 |
|                  | 1-palmitoylglycerophosphoinositol                | 1.27 | 1.23 | 0.0777 | 0.1507 | 0.1030 | 0.1883 |
|                  | 1-stearoylglycerophosphoinositol                 | 1.24 | 1.21 | 0.0312 | 0.0860 | 0.0419 | 0.1040 |
|                  | 2-stearoylglycerophosphoinositol                 | 1.22 | 1.19 | 0.0894 | 0.1650 | 0.1155 | 0.1994 |
|                  | 1-oleoylglycerophosphoinositol                   | 1.08 | 1.07 | 0.8549 | 0.6190 | 0.9357 | 0.6307 |
|                  | 1-linoleoylglycerophosphoinositol                | 1.09 | 1.09 | 0.6550 | 0.5466 | 0.6540 | 0.5390 |
|                  | 1-arachidonoylglycerophosphoinositol             | 1.20 | 1.19 | 0.0340 | 0.0919 | 0.0438 | 0.1074 |
|                  | 1-palmitoylplasmylethanolamine                   | 1.42 | 1.39 | 0.0093 | 0.0344 | 0.0136 | 0.0466 |
|                  | 1-arachidonoylglycerophosphate                   | 0.76 | 0.74 | 0.7624 | 0.5843 | 0.6642 | 0.5395 |
|                  | 2-eicosapentaenoylglycerophosphoethanolamine     | 1.05 | 1.04 | 0.8571 | 0.6190 | 0.9027 | 0.6261 |
|                  | 1-eicosatrienoylglycerophosphoethanolamine       | 1.04 | 1.03 | 0.5255 | 0.4905 | 0.5671 | 0.5084 |
|                  | 1-docosahexaenoylglycerophosphoethanolamine      | 1.22 | 1.19 | 0.1204 | 0.1978 | 0.1577 | 0.2389 |
|                  | 1-linolenoylglycerophosphocholine (18:3n3)       | 0.94 | 0.94 | 0.7807 | 0.5879 | 0.7595 | 0.5740 |
|                  | 1-eicosenoylglycerophosphocholine (20:1n9)       | 0.93 | 0.92 | 0.9343 | 0.6307 | 0.8725 | 0.6150 |
|                  | 1-eicosapentaenoylglycerophosphocholine (20:5n3) | 1.16 | 1.16 | 0.3348 | 0.3721 | 0.3489 | 0.3791 |
|                  | 1-oleoylplasmylethanolamine                      | 1.36 | 1.34 | 0.0347 | 0.0919 | 0.0463 | 0.1102 |
|                  | 1-eicosapentaenoylglycerophosphoethanolamine     | 0.93 | 0.92 | 0.8705 | 0.6190 | 0.8357 | 0.6064 |
|                  | 1-nonadecanoylglycerophosphocholine(19:0)        | 0.70 | 0.70 | 0.4958 | 0.4804 | 0.4760 | 0.4632 |
|                  | 2-linolenoylglycerophosphocholine(18:3n3)        | 1.09 | 1.08 | 0.6341 | 0.5370 | 0.6764 | 0.5411 |
|                  | 1-linolenoylglycerophosphoethanolamine (18:3n3)  | 0.88 | 0.87 | 0.7426 | 0.5780 | 0.6967 | 0.5436 |
| Monoacylglycerol | 1-stearoylglycerol (1-monostearin)               | 1.09 | 1.00 | 0.7933 | 0.5955 | 0.6541 | 0.5390 |
| Sphingolipid     | sphinganine                                      | 1.96 | 1.97 | 0.0095 | 0.0347 | 0.0094 | 0.0347 |
|                  | sphingosine                                      | 1.63 | 1.64 | 0.3421 | 0.3770 | 0.3501 | 0.3791 |
|                  | sphingosine 1-phosphate                          | 0.80 | 0.81 | 0.0061 | 0.0258 | 0.0087 | 0.0330 |
|                  | palmitoyl sphingomyelin                          | 1.15 | 1.16 | 0.0526 | 0.1172 | 0.0407 | 0.1031 |
|                  | stearoyl sphingomyelin                           | 1.36 | 1.37 | 0.0035 | 0.0174 | 0.0025 | 0.0149 |
| Sterol/Steroid   | lathosterol                                      | 1.23 | 1.22 | 0.0471 | 0.1127 | 0.0512 | 0.1164 |
|                  | cholesterol                                      | 1.13 | 1.13 | 0.0056 | 0.0239 | 0.0055 | 0.0244 |
|                  | 7-beta-hydroxycholesterol                        | 1.36 | 1.36 | 0.0038 | 0.0179 | 0.0044 | 0.0210 |
|                  | dehydroisoandrosterone sulfate (DHEA-S)          | 1.02 | 1.03 | 0.2825 | 0.3445 | 0.2856 | 0.3398 |
|                  | epiandrosterone sulfate                          | 0.92 | 0.93 | 0.1847 | 0.2617 | 0.2048 | 0.2807 |
|                  | androsterone sulfate                             | 1.08 | 1.10 | 0.8985 | 0.6221 | 0.9856 | 0.6407 |
|                  | estrone 3-sulfate                                | 1.46 | 1.46 | 0.0226 | 0.0659 | 0.0231 | 0.0675 |
|                  | cortisol                                         | 0.88 | 0.88 | 0.1490 | 0.2320 | 0.1340 | 0.2173 |
|                  | cortisone                                        | 1.14 | 1.14 | 0.3071 | 0.3590 | 0.3079 | 0.3537 |
|                  | campesterol                                      | 1.08 | 1.08 | 0.3221 | 0.3607 | 0.3588 | 0.3844 |
|                  | 7-alpha-hydroxy-3-oxo-4-cholestenoate (7-Hoca)   | 1.41 | 1.39 | 0.0000 | 0.0003 | 0.0000 | 0.0004 |



|                                                      |                                                   |       |       |        |        |        |        |
|------------------------------------------------------|---------------------------------------------------|-------|-------|--------|--------|--------|--------|
|                                                      | 4-androsten-3beta,17beta-diol disulfate 1         | 1.04  | 1.00  | 0.5019 | 0.4804 | 0.5956 | 0.5192 |
|                                                      | 4-androsten-3beta,17beta-diol disulfate 2         | 0.98  | 0.99  | 0.9326 | 0.6307 | 0.9410 | 0.6321 |
|                                                      | 5alpha-androstan-3alpha,17beta-diol monosulfate 1 | 1.27  | 1.27  | 0.1124 | 0.1905 | 0.1211 | 0.2050 |
|                                                      | 5alpha-androstan-3beta,17beta-diol disulfate      | 0.71  | 0.70  | 0.9238 | 0.6289 | 0.8671 | 0.6137 |
|                                                      | 5alpha-pregnan-3beta,20alpha-diol disulfate       | 1.45  | 1.47  | 0.8171 | 0.6036 | 0.8697 | 0.6143 |
|                                                      | 5alpha-pregnan-3alpha,20beta-diol disulfate 1     | 1.40  | 1.42  | 0.9088 | 0.6235 | 0.9184 | 0.6280 |
|                                                      | pregnen-diol disulfate                            | 1.09  | 1.08  | 0.4080 | 0.4183 | 0.4538 | 0.4530 |
|                                                      | pregn steroid monosulfate                         | 1.02  | 1.02  | 0.5726 | 0.5123 | 0.5703 | 0.5090 |
|                                                      | andro steroid monosulfate 1                       | 1.55  | 1.57  | 0.1205 | 0.1978 | 0.1188 | 0.2042 |
|                                                      | andro steroid monosulfate 2                       | 1.53  | 1.55  | 0.1530 | 0.2361 | 0.1107 | 0.1945 |
|                                                      | 21-hydroxypregnenolone monosulfate 1              | 1.00  | 1.01  | 0.8350 | 0.6103 | 0.8978 | 0.6239 |
|                                                      | 21-hydroxypregnenolone disulfate                  | 1.03  | 1.03  | 0.6420 | 0.5416 | 0.6636 | 0.5395 |
|                                                      | 5alpha-androstan-3beta,17alpha-diol disulfate     | 0.75  | 0.76  | 0.3453 | 0.3782 | 0.3729 | 0.3963 |
|                                                      | 5alpha-androstan-3alpha,17beta-diol disulfate     | 0.67  | 0.65  | 0.5900 | 0.5147 | 0.5206 | 0.4821 |
|                                                      | pregnenolone sulfate                              | 0.86  | 0.85  | 0.1427 | 0.2241 | 0.1203 | 0.2050 |
|                                                      | pregnanediol-3-glucuronide                        | 1.06  | 1.08  | 0.1856 | 0.2620 | 0.2181 | 0.2934 |
|                                                      | 5alpha-androstan-3beta,17beta-diol monosulfate 2  | 1.00  | 0.99  | 0.5428 | 0.5027 | 0.5874 | 0.5163 |
|                                                      | 5-pregnen-3b, 17-diol-20-one 3-sulfate            | 1.01  | 0.99  | 0.7285 | 0.5761 | 0.6425 | 0.5351 |
| Glycerophosphodiester                                | 1-palmitoylglycerophosphoglycerol                 | 1.08  | 1.07  | 0.7677 | 0.5855 | 0.8547 | 0.6112 |
|                                                      | 1-stearoylglycerophosphoglycerol                  | 1.28  | 1.22  | 0.0941 | 0.1711 | 0.1304 | 0.2144 |
| Purine metabolism, (hypo)xanthine/inosine containing | xanthine                                          | 1.62  | 1.55  | 0.0006 | 0.0053 | 0.0010 | 0.0082 |
|                                                      | xanthosine                                        | 1.99  | 1.95  | 0.0000 | 0.0002 | 0.0000 | 0.0003 |
|                                                      | hypoxanthine                                      | 1.55  | 1.47  | 0.1885 | 0.2639 | 0.2251 | 0.2956 |
|                                                      | inosine                                           | 22.22 | 11.42 | 0.0735 | 0.1449 | 0.1346 | 0.2173 |
|                                                      | 2'-deoxyinosine                                   | 1.00  | 1.00  |        |        |        |        |
| Purine metabolism, adenine containing                | N1-methyladenosine                                | 1.18  | 1.18  | 0.0000 | 0.0005 | 0.0000 | 0.0005 |
|                                                      | N6-methyladenosine                                | 1.41  | 1.36  | 0.0022 | 0.0129 | 0.0039 | 0.0195 |
|                                                      | adenosine 5'-monophosphate (AMP)                  | 1.86  | 1.87  | 0.0491 | 0.1145 | 0.0536 | 0.1182 |
|                                                      | adenosine 5'-diphosphate (ADP)                    | 4.46  | 4.51  | 0.0000 | 0.0000 | 0.0000 | 0.0000 |
| Purine metabolism, guanine containing                | 7-methylguanine                                   | 1.17  | 1.16  | 0.0021 | 0.0129 | 0.0032 | 0.0171 |
|                                                      | N1-methylguanosine                                | 1.47  | 1.47  | 0.0000 | 0.0006 | 0.0000 | 0.0007 |
|                                                      | N2,N2-dimethylguanosine                           | 1.13  | 1.12  | 0.0122 | 0.0410 | 0.0151 | 0.0507 |
|                                                      | N6-carbamoylthreonyladenosine                     | 1.15  | 1.15  | 0.0020 | 0.0127 | 0.0028 | 0.0157 |
| Purine metabolism, urate metabolism                  | urate                                             | 1.12  | 1.11  | 0.0271 | 0.0764 | 0.0362 | 0.0950 |
|                                                      | allantoin                                         | 1.19  | 1.19  | 0.1051 | 0.1816 | 0.1109 | 0.1945 |
| Pyrimidine metabolism, cytidine containing           | N4-acetylcytidine                                 | 1.22  | 1.21  | 0.0414 | 0.1034 | 0.0523 | 0.1173 |
| Pyrimidine metabolism, thymine containing            | 5,6-dihydrothymine                                | 1.75  | 1.78  | 0.0000 | 0.0001 | 0.0000 | 0.0000 |
| Pyrimidine metabolism, uracil containing             | uridine                                           | 1.00  | 1.00  | 0.9082 | 0.6235 | 0.8356 | 0.6064 |
|                                                      | pseudouridine                                     | 1.09  | 1.09  | 0.0085 | 0.0329 | 0.0102 | 0.0357 |
|                                                      | 5-methyluridine (ribothymidine)                   | 0.99  | 0.99  | 0.8867 | 0.6221 | 0.8073 | 0.5958 |
| Ascorbate and aldarate metabolism                    | threonate                                         | 0.64  | 0.63  | 0.0000 | 0.0005 | 0.0000 | 0.0004 |

|                                        |                                                   |             |             |        |        |        |        |
|----------------------------------------|---------------------------------------------------|-------------|-------------|--------|--------|--------|--------|
| Hemoglobin and porphyrin metabolism    | heme                                              | 2.37        | 2.41        | 0.2085 | 0.2827 | 0.1807 | 0.2547 |
|                                        | L-urobilin                                        | 1.13        | 1.15        | 0.9885 | 0.6463 | 0.9664 | 0.6371 |
|                                        | bilirubin (Z,Z)                                   | 0.96        | 0.98        | 0.3912 | 0.4054 | 0.3595 | 0.3844 |
|                                        | bilirubin (E,E)                                   | 1.14        | 1.16        | 0.6521 | 0.5466 | 0.5967 | 0.5192 |
|                                        | bilirubin (E,Z or Z,E)                            | 1.12        | 1.13        | 0.4793 | 0.4674 | 0.4347 | 0.4416 |
|                                        | biliverdin                                        | <b>1.89</b> | <b>1.90</b> | 0.0002 | 0.0025 | 0.0003 | 0.0029 |
|                                        | urobilinogen                                      | 0.95        | 0.94        | 0.8629 | 0.6190 | 0.8001 | 0.5943 |
| Nicotinate and nicotinamide metabolism | nicotinamide                                      | <b>1.61</b> | <b>1.62</b> | 0.0958 | 0.1731 | 0.0960 | 0.1782 |
|                                        | nicotinurate                                      | 1.00        | 1.00        |        |        |        |        |
|                                        | 1-methylnicotinamide                              | 1.69        | 1.70        | 0.4742 | 0.4651 | 0.4712 | 0.4607 |
|                                        | trigonelline (N'-methylnicotinate)                | 0.75        | 0.74        | 0.3871 | 0.4048 | 0.3582 | 0.3844 |
|                                        | N1-Methyl-2-pyridone-5-carboxamide                | 1.08        | 1.08        | 0.7942 | 0.5955 | 0.8049 | 0.5953 |
| Pantothenate and CoA metabolism        | pantothenate                                      | 1.31        | 1.29        | 0.1017 | 0.1783 | 0.1328 | 0.2170 |
| Pyridoxal metabolism                   | pyridoxate                                        | 0.85        | 0.84        | 0.1819 | 0.2609 | 0.1566 | 0.2389 |
| Riboflavin metabolism                  | riboflavin (Vitamin B2)                           | 0.96        | 0.96        | 0.7316 | 0.5764 | 0.7448 | 0.5692 |
| Tocopherol metabolism                  | alpha-tocopherol                                  | 1.19        | 1.20        | 0.5586 | 0.5080 | 0.5327 | 0.4920 |
|                                        | gamma-tocopherol                                  | 1.26        | 1.27        | 0.1352 | 0.2173 | 0.1258 | 0.2109 |
|                                        | gamma-CEHC                                        | 1.01        | 1.02        | 0.8819 | 0.6221 | 0.7881 | 0.5889 |
|                                        | gamma-CEHC glucuronide                            | 1.04        | 1.05        | 0.6860 | 0.5647 | 0.6554 | 0.5390 |
| Benzoate metabolism                    | hippurate                                         | <b>0.50</b> | <b>0.50</b> | 0.0103 | 0.0365 | 0.0099 | 0.0357 |
|                                        | 3-methyl catechol sulfate 1                       | <b>0.72</b> | <b>0.72</b> | 0.0527 | 0.1172 | 0.0468 | 0.1108 |
|                                        | 3-methyl catechol sulfate 2                       | <b>0.67</b> | <b>0.67</b> | 0.0845 | 0.1612 | 0.0830 | 0.1593 |
|                                        | 4-methylcatechol sulfate                          | 1.00        | 0.99        | 0.6850 | 0.5647 | 0.6430 | 0.5351 |
|                                        | 2-hydroxyhippurate (salicylurate)                 | 0.90        | 0.91        | 0.6778 | 0.5616 | 0.6216 | 0.5288 |
|                                        | 3-hydroxyhippurate                                | 0.90        | 0.90        | 0.4710 | 0.4632 | 0.4517 | 0.4523 |
|                                        | 4-hydroxyhippurate                                | 0.74        | 0.73        | 0.1826 | 0.2609 | 0.1550 | 0.2389 |
|                                        | catechol sulfate                                  | 0.81        | 0.81        | 0.1552 | 0.2383 | 0.1381 | 0.2204 |
|                                        | benzoate                                          | 0.94        | 0.94        | 0.6956 | 0.5692 | 0.6445 | 0.5351 |
|                                        | 3-ethylphenylsulfate                              | 1.56        | 1.58        | 0.9719 | 0.6415 | 0.9434 | 0.6321 |
|                                        | 4-ethylphenylsulfate                              | 1.19        | 1.20        | 0.5604 | 0.5080 | 0.5896 | 0.5169 |
|                                        | 4-vinylphenol sulfate                             | 0.91        | 0.90        | 0.9988 | 0.6494 | 0.9552 | 0.6357 |
|                                        | O-methylcatechol sulfate                          | 0.89        | 0.88        | 0.2224 | 0.2918 | 0.1873 | 0.2620 |
| Chemical                               | glycolate (hydroxyacetate)                        | <b>0.71</b> | <b>0.71</b> | 0.0000 | 0.0000 | 0.0000 | 0.0000 |
|                                        | iminodiacetate (IDA)                              | 0.95        | 0.96        | 0.4551 | 0.4530 | 0.5013 | 0.4746 |
|                                        | 2-hydroxyisobutyrate                              | 1.09        | 1.09        | 0.3008 | 0.3553 | 0.3246 | 0.3629 |
|                                        | glycerol 2-phosphate                              | 1.28        | 1.29        | 0.5120 | 0.4843 | 0.4939 | 0.4746 |
|                                        | 2-ethylhexanoate (isobar with 2-propylpentanoate) | 2.39        | 2.41        | 0.5819 | 0.5137 | 0.5845 | 0.5163 |
|                                        | dexpanthenol                                      | 1.00        | 1.00        |        |        |        |        |
|                                        | phenylcarnitine                                   | 1.11        | 1.11        | 0.3705 | 0.3958 | 0.4003 | 0.4202 |
|                                        | 2-piperidinone                                    | 0.87        | 0.80        | 0.9580 | 0.6365 | 0.9236 | 0.6280 |
|                                        | dimethyl sulfone                                  | 0.91        | 0.91        | 0.5027 | 0.4804 | 0.5172 | 0.4804 |
|                                        | 2-aminophenol sulfate                             | <b>0.70</b> | <b>0.71</b> | 0.0222 | 0.0659 | 0.0305 | 0.0851 |
|                                        | O-sulfo-L-tyrosine                                | <b>1.11</b> | <b>1.12</b> | 0.0646 | 0.1320 | 0.0534 | 0.1182 |
| Drug                                   | quetiapine                                        | 1.00        | 1.00        |        |        |        |        |



|                                           |              |              |        |        |        |        |
|-------------------------------------------|--------------|--------------|--------|--------|--------|--------|
| salicylate                                | 1.26         | 1.28         | 0.7274 | 0.5761 | 0.6879 | 0.5436 |
| salicyluric glucuronide                   | 1.27         | 1.28         | 0.8641 | 0.6190 | 0.8484 | 0.6080 |
| 4-acetaminophen sulfate                   | 0.25         | 0.20         | 0.7677 | 0.5855 | 0.6081 | 0.5211 |
| 4-acetamidophenol                         | 0.06         | 0.06         | 0.3542 | 0.3842 | 0.3237 | 0.3629 |
| p-acetamidophenylglucuronide              | 0.02         | 0.02         | 0.9045 | 0.6230 | 0.9665 | 0.6371 |
| 2-hydroxyacetaminophen sulfate            | 0.89         | 0.89         | 0.5792 | 0.5137 | 0.5865 | 0.5163 |
| 2-methoxyacetaminophen sulfate            | 0.93         | 0.91         | 0.8078 | 0.6005 | 0.6684 | 0.5400 |
| 3-(cystein-S-yl)acetaminophen             | 1.35         | 1.30         | 0.8309 | 0.6085 | 0.6803 | 0.5415 |
| 2-methoxyacetaminophen glucuronide        | 0.85         | 0.82         | 0.2870 | 0.3484 | 0.1682 | 0.2472 |
| 4-acetylphenol sulfate                    | <b>0.51</b>  | <b>0.51</b>  | 0.0062 | 0.0258 | 0.0055 | 0.0244 |
| ibuprofen                                 | 1.36         | 1.38         | 0.5844 | 0.5137 | 0.5682 | 0.5084 |
| carboxyibuprofen                          | 0.93         | 0.94         | 0.6271 | 0.5326 | 0.6000 | 0.5200 |
| furosemide                                | 1.00         | 1.00         |        |        |        |        |
| naproxen                                  | 1.18         | 1.20         | 0.9356 | 0.6307 | 0.9195 | 0.6280 |
| desmethylnaproxen sulfate                 | 1.13         | 1.13         | 0.4483 | 0.4511 | 0.4408 | 0.4431 |
| lidocaine                                 | <b>1.21</b>  | <b>1.21</b>  | 0.0662 | 0.1320 | 0.0661 | 0.1385 |
| metformin                                 | 1.00         | 1.01         | 0.7245 | 0.5761 | 0.7321 | 0.5624 |
| metoprolol                                | <b>1.05</b>  | <b>1.05</b>  | 0.0931 | 0.1710 | 0.0931 | 0.1747 |
| metoprolol acid metabolite                | <b>10.28</b> | <b>10.44</b> | 0.0446 | 0.1083 | 0.0446 | 0.1079 |
| hydroquinone sulfate                      | 0.68         | 0.68         | 0.1130 | 0.1905 | 0.1101 | 0.1945 |
| fexofenadine                              | 0.98         | 0.98         | 0.8298 | 0.6085 | 0.8390 | 0.6068 |
| fluoxetine                                | 1.00         | 1.00         |        |        |        |        |
| norfluoxetine                             | 1.00         | 1.00         |        |        |        |        |
| 6-oxopiperidine-2-carboxylic acid         | <b>0.81</b>  | <b>0.80</b>  | 0.0128 | 0.0424 | 0.0102 | 0.0357 |
| celecoxib                                 | 1.00         | 1.00         |        |        |        |        |
| diphenhydramine                           | 1.02         | 1.02         | 0.3214 | 0.3607 | 0.3215 | 0.3617 |
| ibuprofen acyl glucuronide                | 0.09         | 0.09         | 0.7522 | 0.5816 | 0.7327 | 0.5624 |
| pantoprazole                              | 1.00         | 1.00         |        |        |        |        |
| carbamazepine                             | 1.00         | 1.00         |        |        |        |        |
| carbamazepine 10,11-epoxide               | 1.00         | 1.00         |        |        |        |        |
| hydrochlorothiazide                       | 0.61         | 0.62         | 0.2611 | 0.3296 | 0.2691 | 0.3296 |
| carbamazepine glucuronide                 | 1.00         | 1.00         |        |        |        |        |
| gabapentin                                | 1.00         | 1.00         |        |        |        |        |
| benzoylecgonine                           | 1.05         | 1.05         | 0.3214 | 0.3607 | 0.3215 | 0.3617 |
| meprobamate                               | 1.00         | 1.00         |        |        |        |        |
| paroxetine                                | 1.00         | 1.00         |        |        |        |        |
| atenolol                                  | 1.00         | 1.00         |        |        |        |        |
| omeprazole                                | 1.00         | 0.99         | 0.8631 | 0.6190 | 0.6634 | 0.5395 |
| escitalopram                              | 1.10         | 1.11         | 0.6745 | 0.5602 | 0.6611 | 0.5395 |
| verapamil                                 | 1.00         | 1.00         |        |        |        |        |
| quinine                                   | 1.00         | 1.00         |        |        |        |        |
| oxypurinol                                | 1.00         | 1.00         |        |        |        |        |
| 3-(N-acetyl-L-cystein-S-yl) acetaminophen | 1.14         | 1.14         | 0.8037 | 0.5988 | 0.8270 | 0.6052 |
| 2-hydroxyibuprofen                        | 0.90         | 0.91         | 0.6968 | 0.5692 | 0.6706 | 0.5400 |
| desvenlafaxine                            | 1.00         | 1.00         | 0.3214 | 0.3607 | 0.3215 | 0.3617 |

|                                 |                                      |      |      |        |        |        |        |
|---------------------------------|--------------------------------------|------|------|--------|--------|--------|--------|
|                                 | norbenzoylecgonine                   | 1.05 | 1.05 | 0.3214 | 0.3607 | 0.3215 | 0.3617 |
| EDTA                            | EDTA                                 | 1.16 | 1.16 | 0.0000 | 0.0003 | 0.0000 | 0.0004 |
| Food component/Plant            | indoleacrylate                       | 0.98 | 0.99 | 0.1877 | 0.2638 | 0.1651 | 0.2447 |
|                                 | saccharin                            | 0.25 | 0.26 | 0.9260 | 0.6291 | 0.9594 | 0.6369 |
|                                 | quinat                               | 0.86 | 0.85 | 0.2055 | 0.2817 | 0.1793 | 0.2544 |
|                                 | piperine                             | 0.97 | 0.97 | 0.4636 | 0.4573 | 0.4406 | 0.4431 |
|                                 | dihydroferulic acid                  | 1.23 | 1.22 | 0.2101 | 0.2827 | 0.1735 | 0.2507 |
|                                 | thymol sulfate                       | 0.54 | 0.53 | 0.0855 | 0.1622 | 0.0717 | 0.1454 |
|                                 | ergothioneine                        | 0.96 | 0.97 | 0.5205 | 0.4883 | 0.5489 | 0.4976 |
|                                 | N-(2-furoyl)glycine                  | 0.48 | 0.48 | 0.0092 | 0.0344 | 0.0082 | 0.0319 |
|                                 | stachydrine                          | 0.79 | 0.76 | 0.0457 | 0.1101 | 0.0342 | 0.0915 |
|                                 | homostachydrine                      | 1.42 | 1.43 | 0.2209 | 0.2918 | 0.2209 | 0.2934 |
|                                 | 4-hydroxyproline betaine             | 0.79 | 0.79 | 0.2551 | 0.3233 | 0.2321 | 0.3002 |
|                                 | cinnamoylglycine                     | 1.10 | 1.11 | 0.9179 | 0.6285 | 0.8604 | 0.6126 |
|                                 | sucralose                            | 0.28 | 0.26 | 0.0488 | 0.1145 | 0.0377 | 0.0977 |
| Xanthine metabolism             | caffeine                             | 1.06 | 0.96 | 0.8133 | 0.6020 | 0.9097 | 0.6265 |
|                                 | paraxanthine                         | 1.02 | 1.03 | 0.8960 | 0.6221 | 0.9094 | 0.6265 |
|                                 | theobromine                          | 1.49 | 1.47 | 0.0578 | 0.1254 | 0.0652 | 0.1374 |
|                                 | theophylline                         | 1.14 | 1.10 | 0.4170 | 0.4221 | 0.4722 | 0.4607 |
|                                 | 1-methylurate                        | 0.95 | 0.96 | 0.6589 | 0.5485 | 0.6711 | 0.5400 |
|                                 | 1,3-dimethylurate                    | 1.03 | 1.04 | 0.7578 | 0.5833 | 0.6964 | 0.5436 |
|                                 | 1,7-dimethylurate                    | 1.30 | 1.31 | 0.4161 | 0.4221 | 0.4167 | 0.4296 |
|                                 | 3,7-dimethylurate                    | 1.50 | 1.52 | 0.0540 | 0.1193 | 0.0430 | 0.1060 |
|                                 | 1,3,7-trimethylurate                 | 1.02 | 1.02 | 0.8035 | 0.5988 | 0.7843 | 0.5886 |
|                                 | 1-methylxanthine                     | 0.76 | 0.77 | 0.3973 | 0.4093 | 0.4081 | 0.4233 |
|                                 | 3-methylxanthine                     | 1.26 | 1.23 | 0.2393 | 0.3077 | 0.2741 | 0.3317 |
|                                 | 7-methylxanthine                     | 1.13 | 1.14 | 0.3940 | 0.4071 | 0.4066 | 0.4233 |
|                                 | 5-acetylamino-6-amino-3-methyluracil | 0.73 | 0.74 | 0.2966 | 0.3551 | 0.3079 | 0.3537 |
|                                 | 7-methylurate                        | 1.41 | 1.41 | 0.0077 | 0.0303 | 0.0076 | 0.0310 |
| Tobacco metabolite              | cotinine                             | 0.73 | 0.74 | 0.8411 | 0.6134 | 0.8773 | 0.6151 |
|                                 | hydroxycotinine                      | 1.32 | 1.34 | 0.8967 | 0.6221 | 0.9289 | 0.6303 |
|                                 | cotinine N-oxide                     | 0.88 | 0.89 | 0.9318 | 0.6307 | 0.9626 | 0.6369 |
| Sugar, sugar substitute, starch | erythritol                           | 1.41 | 1.40 | 0.8870 | 0.6221 | 0.9772 | 0.6394 |
| Detoxification metabolism       | ethyl glucuronide                    | 1.98 | 1.24 | 0.2882 | 0.3486 | 0.4413 | 0.4431 |

Quantification of specific pathway metabolites were assessed by ultrahigh performance liquid chromatography/mass spectrometry (UPLC/MS/MS) accompanied by gas chromatography/mass spectrometry (GC/MS). Results represented as ratios for comparison between psoriasis (n=60) vs. healthy plasma (n=30). Green: indicates significant difference ( $p \leq 0.05$ ) between the groups shown, metabolite ratio of  $< 1.00$ ; Light Green: narrowly missed statistical cutoff for significance  $0.05 < p < 0.10$ , metabolite ratio of  $< 1.00$ ; Red: indicates significant difference ( $p \leq 0.05$ ) between the groups shown; metabolite ratio of  $\geq 1.00$ ; Light Red: narrowly missed statistical cutoff for significance  $0.05 < p < 0.10$ , metabolite ratio of  $\geq 1.00$ ; Non-colored text and cell: mean values are not significantly different for that comparison. P values were derived from Welch's t-test.
